# Supplementary material
Source: PubMed Central journal article supplement (PMC8567210)

# Supporting Information — Suppression of O-linked Glycosylation of the SARS-CoV-2 Spike by Quaternary Structural Restraints

Charles F.S. Eldrid<sup>†</sup>, Joel D. Allen<sup>†</sup>, Maddy L. Newby, Max Crispin\*

Corresponding author: max.crispin@soton.ac.uk

School of Biological Sciences, University of Southampton, Southampton, SO17 1BJ, UK

## Contents

|                                                                                                                                                                            |     |
|----------------------------------------------------------------------------------------------------------------------------------------------------------------------------|-----|
| Figure S1 Sequence for HexaPro construct _____                                                                                                                             | S2  |
| Figure S2 Sequence for 2P construct _____                                                                                                                                  | S2  |
| Figure S3 Sequence for RBD construct _____                                                                                                                                 | S2  |
| Figure S4: Full occupancy data for N-linked glycan sites, broken down by composition _____                                                                                 | S3  |
| Table S1: Unambiguously verified O-linked glycans in the Hexapro construct _____                                                                                           | S4  |
| Figure S5: XIC, precursor spectra, and fragmentation spectra of manually verified true positive O-linked glycans for the kifunensine treated spike HexaPro construct _____ | S5  |
| Table S2: Unambiguously verified O-linked glycans in the 2P construct _____                                                                                                | S10 |
| Figure S6: XIC, precursor spectra, and fragmentation spectra of manually verified true positive O-linked glycans for the kifunensine treated spike 2P construct _____      | S11 |
| Figure S7: XIC, precursor spectra, and fragmentation spectra of ambiguous O-linked glycans from both HexaPro and 2P S protein constructs _____                             | S21 |
| Table S3: Unambiguously assigned O-links on peptide <sup>319RVQPTESIVR328</sup> from WT and KT RBD _____                                                                   | S25 |
| Figure S8 MS2 spectra of the most abundant glycans from 319RVQPTESIVR328 from WT and KT RBD _____                                                                          | S26 |
| Table S4: Unambiguously assigned O-links on peptides <sup>465ERDISTEIY473</sup> and <sup>510VVVLSFELLHAPATVCGPK528</sup> from WT and KT RBD _____                          | S32 |
| Figure S9 MS2 spectra of the most abundant glycans on peptides 465ERDISTEIY473 and 510VVVLSFELLHAPATVCGPK528 from WT and KT RBD _____                                      | S33 |

>HexaPro\_SARS-CoV\_2

MFVFLVLLPLVSSQCVNLTRRTQLPPAYTNSFTRGVYYPDKVFRSSVLHSTQDLFLPFFSNVTWFHAIHVSGTNGTK  
RFDNPVLPFNDGVYFASTEKSNIIRGWIFGTTLDSTKQSLIVNNATNVVIVKVEFQFCNDPFLGVYYHKNNKSWM  
ESEFRVYSSANNCTFEYVSQPFLMDLEGKQGNFKNLREFVFNIDGYFKIYSKHTPINLVRDLPQGFSALEPLVDLPIG  
INITRFQTLALHRSYLTPGDSSSGWTAGAAAYVGYLQPRFTLLKYNENGTITDAVDCALDPLSEKTKLSFTVEKG  
IYQTSNFRVQPTESIVRFPNITNLCPFGEVFNATRFASVYAWNRKRISNCVADYSVLYNSASFSTFKCYGVSPKLN  
LCFTNVYADSFVIRGDEVRQIAPGQTGKIADYNYKLPDDFTGCVIAWNSNNLDSKVGGNYNYLYRFRKSNLKP  
FERDISTEIQAGSTPCNGVEGFNCFYPLQSYGFQPTNGVGYQPYRVVLSFELLHAPATVCGPKKSTNLVKNKCVNF  
NGLTGTGVLTESNKKFLPFQQFGRDIADTTDAVRDPQTLEILDITPCSFGGVSVITPGTNTSNQVAVLYQDVNCTE  
VPAIHADQLTPTWRVYSTGSNVFQTRAGCLIGAEHVNSYECDIPIGAGICASYQTQTNSPGSASSVASQSIIAYTM  
SLGAENSVAYSNNSIAIPTNFTISVTTEILPVSMTKTSVDCTMYICGDSTECNLLLQYGSFCTQLNRALTGIAVEQDK  
NTQEVFAQVKQIYKTPPIKDFGGFNFSQILPDPSKPSKRSPIEDLLFNKVTLADAGFIKQYGDCLGDIARDLCAQKF  
NGLTVLPPLLTDEMQIYTSALLAGTITSGWTFGAGPALQIPFPMQIMAYRFNGIGVTVQNVLYENQKLIANQFN  
SAI GKIQDLSSTSPALGKLQDVVNQNAQALNTLVKQLSSNFGAISSVLNDILSRDPPEAEVQIDRLITGRQLSLQTYVT  
QQLRAAEIRASANLAATKMSECVLGQSKRVDFCGKGYHLSFQPSAPHGVVFLHVTYVPAQEKNTTAPAICH  
D GKAHFPREGVFSNGTHWFVTQRNFYEPQIITDNTFVSGNCDVVIGIVNNTVYDPLQPELDSFKEELDKYFKNHT  
SPDVLGDISGINASVNIQKEIDRLNEVAKNLNESLIDLQELGKYEQGSYIPEAPRDGQAYVRKDGWVLLSTFLG  
RSLEVLFGGPHHHHHHHHSAWSHPQFEK

**Figure S1** Sequence for HexaPro construct

MFVFLVLLPLVSSQCVNLTRRTQLPPAYTNSFTRGVYYPDKVFRSSVLHSTQDLFLPFFSNVTWFHAIHVSGTNGTK  
RFDNPVLPFNDGVYFASTEKSNIIRGWIFGTTLDSTKQSLIVNNATNVVIVKVEFQFCNDPFLGVYYHKNNKSWM  
ESEFRVYSSANNCTFEYVSQPFLMDLEGKQGNFKNLREFVFNIDGYFKIYSKHTPINLVRDLPQGFSALEPLVDLPIG  
INITRFQTLALHRSYLTPGDSSSGWTAGAAAYVGYLQPRFTLLKYNENGTITDAVDCALDPLSEKTKLSFTVEKG  
IYQTSNFRVQPTESIVRFPNITNLCPFGEVFNATRFASVYAWNRKRISNCVADYSVLYNSASFSTFKCYGVSPKLN  
LCFTNVYADSFVIRGDEVRQIAPGQTGKIADYNYKLPDDFTGCVIAWNSNNLDSKVGGNYNYLYRFRKSNLKP  
FERDISTEIQAGSTPCNGVEGFNCFYPLQSYGFQPTNGVGYQPYRVVLSFELLHAPATVCGPKKSTNLVKNKCVNF  
NGLTGTGVLTESNKKFLPFQQFGRDIADTTDAVRDPQTLEILDITPCSFGGVSVITPGTNTSNQVAVLYQDVNCTE  
VPAIHADQLTPTWRVYSTGSNVFQTRAGCLIGAEHVNSYECDIPIGAGICASYQTQTNSPGSASSVASQSIIAYTM  
SLGAENSVAYSNNSIAIPTNFTISVTTEILPVSMTKTSVDCTMYICGDSTECNLLLQYGSFCTQLNRALTGIAVEQDK  
NTQEVFAQVKQIYKTPPIKDFGGFNFSQILPDPSKPSKRSPIEDLLFNKVTLADAGFIKQYGDCLGDIARDLCAQKF  
NGLTVLPPLLTDEMQIYTSALLAGTITSGWTFGAGAALQIPFAMQIMAYRFNGIGVTVQNVLYENQKLIANQFN  
SAI GKIQDLSSTASALGKLQDVVNQNAQALNTLVKQLSSNFGAISSVLNDILSRDPPEAEVQIDRLITGRQLSLQTYVT  
QQLRAAEIRASANLAATKMSECVLGQSKRVDFCGKGYHLSFQPSAPHGVVFLHVTYVPAQEKNTTAPAICH  
D GKAHFPREGVFSNGTHWFVTQRNFYEPQIITDNTFVSGNCDVVIGIVNNTVYDPLQPELDSFKEELDKYFKNHT  
SPDVLGDISGINASVNIQKEIDRLNEVAKNLNESLIDLQELGKYEQGSYIPEAPRDGQAYVRKDGWVLLSTFLG  
RSLEVLFGGPHHHHHHHHSAWSHPQFEK

**Figure S2** Sequence for 2P construct

>SARS-CoV-2\_RBD

MDAMKRGLCCVLLCGAVFVSPSQEIHARFRRGARRVQPTESIVRFPNITNLCPFGEVFNATRFASVYAWNRKRIS  
NCVADYSVLYNSASFSTFKCYGVSPKLNLCFTNVYADSFVIRGDEVRQIAPGQTGKIADYNYKLPDDFTGCVIAW  
NSNNLDSKVGGNYNYLYRFRKSNLKPFERDISTEIQAGSTPCNGVEGFNCFYPLQSYGFQPTNGVGYQPYRVV  
LSFELLHAPATVCGPKKSTNLVKNKCVNNGSGSGGSHHHHHH

**Figure S3** Sequence for RBD construct

| Site       | N17   | N61    | N74    | N122   | N149   | N165   | N234   | N282   | N331   | N343   | N603   | N616   | N657   | N709   | N717   | N801   | N1074  | N1098  | N1134  | N1158  | N1173   | N1994  |        |  |  |
|------------|-------|--------|--------|--------|--------|--------|--------|--------|--------|--------|--------|--------|--------|--------|--------|--------|--------|--------|--------|--------|---------|--------|--------|--|--|
| M9Glc      | 0.00% | 0.00%  | 0.00%  | 0.00%  | 0.00%  | 0.00%  | 0.00%  | 0.00%  | 0.00%  | 0.00%  | 0.00%  | 0.00%  | 0.00%  | 0.00%  | 0.00%  | 0.00%  | 0.00%  | 0.00%  | 0.00%  | 0.00%  | 0.00%   | 0.00%  | 0.00%  |  |  |
| M9         | 0.00% | 97.71% | 72.21% | 96.81% | 82.77% | 89.17% | 99.32% | 95.18% | 67.96% | 94.15% | 93.33% | 98.05% | 99.86% | 87.90% | 93.41% | 93.88% | 88.89% | 76.06% | 97.93% | 87.23% | 100.00% | 59.53% |        |  |  |
| M8         | 0.00% | 0.00%  | 15.81% | 0.00%  | 11.60% | 6.10%  | 0.57%  | 2.36%  | 8.68%  | 0.00%  | 0.00%  | 0.00%  | 0.00%  | 12.10% | 0.00%  | 2.44%  | 0.00%  | 0.00%  | 0.00%  | 8.92%  | 0.00%   | 23.82% |        |  |  |
| M7         | 0.00% | 0.00%  | 3.89%  | 0.00%  | 0.00%  | 0.29%  | 0.04%  | 0.00%  | 4.26%  | 0.00%  | 0.00%  | 0.00%  | 0.00%  | 0.00%  | 0.00%  | 0.56%  | 0.00%  | 0.35%  | 0.00%  | 0.00%  | 0.00%   | 16.63% |        |  |  |
| M6         | 0.00% | 0.00%  | 0.00%  | 0.00%  | 0.00%  | 0.00%  | 0.00%  | 0.00%  | 0.00%  | 0.00%  | 0.00%  | 0.00%  | 0.00%  | 0.00%  | 2.48%  | 0.00%  | 0.75%  | 0.00%  | 0.34%  | 0.00%  | 0.00%   | 0.00%  |        |  |  |
| M5         | 0.00% | 0.00%  | 0.00%  | 0.00%  | 0.00%  | 3.00%  | 0.00%  | 0.48%  | 0.00%  | 0.00%  | 0.00%  | 2.85%  | 0.00%  | 0.00%  | 4.11%  | 2.52%  | 0.85%  | 0.00%  | 0.00%  | 0.00%  | 0.00%   | 0.00%  |        |  |  |
| M4         | 0.00% | 0.25%  | 0.00%  | 0.00%  | 0.00%  | 0.00%  | 0.00%  | 0.00%  | 0.00%  | 0.00%  | 0.00%  | 0.00%  | 0.00%  | 0.00%  | 0.00%  | 0.00%  | 0.79%  | 0.00%  | 0.00%  | 0.00%  | 0.00%   | 0.00%  |        |  |  |
| M3         | 0.00% | 0.00%  | 0.00%  | 0.00%  | 0.00%  | 0.00%  | 0.00%  | 0.00%  | 0.00%  | 0.00%  | 0.00%  | 0.00%  | 0.00%  | 0.00%  | 0.00%  | 0.00%  | 0.22%  | 0.00%  | 0.00%  | 0.00%  | 0.00%   | 0.00%  |        |  |  |
| FM         | 0.00% | 0.00%  | 0.00%  | 0.00%  | 0.00%  | 0.00%  | 0.00%  | 0.00%  | 0.00%  | 0.00%  | 0.00%  | 0.00%  | 0.00%  | 0.00%  | 0.00%  | 0.00%  | 0.00%  | 0.00%  | 0.00%  | 0.00%  | 0.00%   | 0.00%  | 0.00%  |  |  |
| HYBRID     | 0.00% | 0.00%  | 0.00%  | 0.87%  | 0.00%  | 0.00%  | 0.00%  | 0.00%  | 0.00%  | 0.00%  | 0.00%  | 0.00%  | 0.00%  | 0.00%  | 0.00%  | 0.00%  | 0.28%  | 0.19%  | 0.00%  | 0.00%  | 0.00%   | 0.00%  |        |  |  |
| FHYBRID    | 0.00% | 0.00%  | 0.00%  | 0.00%  | 0.00%  | 0.00%  | 0.00%  | 0.00%  | 0.00%  | 0.00%  | 0.00%  | 0.00%  | 0.00%  | 0.00%  | 0.00%  | 0.00%  | 0.00%  | 0.00%  | 0.00%  | 0.00%  | 0.00%   | 0.00%  |        |  |  |
| A1         | 0.00% | 0.19%  | 0.00%  | 0.79%  | 0.00%  | 0.00%  | 0.00%  | 0.27%  | 0.00%  | 0.00%  | 0.00%  | 0.86%  | 0.00%  | 0.00%  | 0.00%  | 0.00%  | 0.00%  | 0.00%  | 0.00%  | 0.00%  | 0.00%   | 0.00%  |        |  |  |
| FA1        | 0.00% | 0.00%  | 0.00%  | 0.78%  | 0.00%  | 0.00%  | 0.00%  | 0.00%  | 0.00%  | 0.54%  | 0.00%  | 0.00%  | 0.00%  | 0.00%  | 0.00%  | 0.00%  | 1.32%  | 0.00%  | 0.62%  | 0.00%  | 0.00%   | 0.00%  |        |  |  |
| A2/A1B     | 0.00% | 1.54%  | 0.00%  | 0.00%  | 0.00%  | 0.00%  | 0.00%  | 0.00%  | 0.00%  | 0.00%  | 0.00%  | 1.08%  | 0.00%  | 0.00%  | 0.00%  | 0.00%  | 0.00%  | 0.00%  | 0.00%  | 0.00%  | 0.00%   | 0.00%  |        |  |  |
| FA2/FA1B   | 0.00% | 0.00%  | 0.00%  | 0.50%  | 4.83%  | 0.00%  | 0.00%  | 0.00%  | 8.23%  | 4.97%  | 0.00%  | 0.00%  | 0.00%  | 0.00%  | 0.00%  | 0.00%  | 2.06%  | 0.00%  | 0.00%  | 0.00%  | 0.00%   | 0.00%  |        |  |  |
| A3/A2B     | 0.00% | 0.31%  | 0.00%  | 0.00%  | 0.08%  | 0.22%  | 0.00%  | 1.71%  | 0.00%  | 0.00%  | 0.00%  | 0.00%  | 0.00%  | 0.00%  | 0.00%  | 0.00%  | 0.00%  | 0.00%  | 0.00%  | 0.00%  | 0.00%   | 0.00%  |        |  |  |
| FA3/FA2B   | 0.00% | 0.00%  | 0.00%  | 0.00%  | 0.72%  | 0.00%  | 0.00%  | 0.00%  | 1.02%  | 0.00%  | 0.00%  | 0.00%  | 0.00%  | 0.00%  | 0.00%  | 0.00%  | 1.27%  | 0.00%  | 0.53%  | 0.00%  | 0.00%   | 0.00%  |        |  |  |
| A4/A3B     | 0.00% | 0.00%  | 0.00%  | 0.00%  | 0.00%  | 0.00%  | 0.00%  | 0.00%  | 0.00%  | 0.00%  | 0.00%  | 0.00%  | 0.00%  | 0.00%  | 0.00%  | 0.00%  | 0.00%  | 0.00%  | 0.00%  | 0.00%  | 0.00%   | 0.00%  |        |  |  |
| FA4/FA3B   | 0.00% | 0.00%  | 0.00%  | 0.00%  | 0.00%  | 0.00%  | 0.00%  | 0.00%  | 0.00%  | 0.00%  | 0.00%  | 0.00%  | 0.00%  | 0.00%  | 0.00%  | 0.00%  | 0.00%  | 0.00%  | 0.00%  | 0.00%  | 0.00%   | 0.00%  |        |  |  |
| UNOCC      | 0.00% | 0.00%  | 1.67%  | 0.25%  | 0.00%  | 0.00%  | 0.00%  | 0.00%  | 9.85%  | 0.00%  | 0.00%  | 0.00%  | 0.14%  | 0.00%  | 0.00%  | 0.00%  | 3.56%  | 23.40% | 0.00%  | 2.47%  | 0.00%   | 0.02%  |        |  |  |
| Core       | 0.00% | 0.00%  | 6.41%  | 0.00%  | 0.00%  | 1.23%  | 0.07%  | 0.00%  | 0.00%  | 0.34%  | 3.82%  | 0.00%  | 0.00%  | 0.00%  | 0.00%  | 0.60%  | 0.00%  | 0.00%  | 0.59%  | 1.38%  | 0.00%   | 0.00%  |        |  |  |
|            |       |        |        |        |        |        |        |        |        |        |        |        |        |        |        |        |        |        |        |        |         |        | SUM    |  |  |
| Hybrid     | 0.00% | 0.00%  | 0.00%  | 0.87%  | 0.00%  | 0.00%  | 0.00%  | 0.00%  | 0.00%  | 0.00%  | 0.00%  | 0.00%  | 0.00%  | 0.00%  | 0.00%  | 0.00%  | 0.28%  | 0.19%  | 0.00%  | 0.00%  | 0.00%   | 0.00%  | 0.06%  |  |  |
| Complex    | 0.00% | 2.04%  | 0.00%  | 2.07%  | 5.63%  | 0.22%  | 0.00%  | 1.98%  | 9.25%  | 5.51%  | 0.00%  | 1.95%  | 0.00%  | 0.00%  | 0.00%  | 0.00%  | 4.66%  | 0.00%  | 1.15%  | 0.00%  | 0.00%   | 0.00%  | 1.64%  |  |  |
| Unoccupied | 0.00% | 0.00%  | 1.67%  | 0.25%  | 0.00%  | 0.00%  | 0.00%  | 0.00%  | 9.85%  | 0.00%  | 0.00%  | 0.00%  | 0.14%  | 0.00%  | 0.00%  | 0.00%  | 3.56%  | 23.40% | 0.00%  | 2.47%  | 0.00%   | 0.02%  | 1.97%  |  |  |
| Man9       | 0.00% | 97.71% | 72.21% | 96.81% | 82.77% | 89.17% | 99.32% | 95.18% | 67.96% | 94.15% | 93.33% | 98.05% | 99.86% | 87.90% | 93.41% | 93.88% | 88.89% | 76.06% | 97.93% | 87.23% | 100.00% | 59.53% | 89.11% |  |  |
| Man8-5     | 0.00% | 0.00%  | 19.70% | 0.00%  | 11.60% | 9.39%  | 0.61%  | 2.84%  | 12.94% | 0.00%  | 2.85%  | 0.00%  | 0.00%  | 12.10% | 6.59%  | 5.52%  | 1.60%  | 0.35%  | 0.34%  | 8.92%  | 0.00%   | 40.45% | 6.47%  |  |  |
| Core       | 0.00% | 0.00%  | 6.41%  | 0.00%  | 0.00%  | 1.23%  | 0.07%  | 0.00%  | 0.00%  | 0.34%  | 3.82%  | 0.00%  | 0.00%  | 0.00%  | 0.00%  | 0.60%  | 0.00%  | 0.00%  | 0.59%  | 1.38%  | 0.00%   | 0.00%  | 0.69%  |  |  |

Figure S4: Full occupancy data for N-linked glycan sites, broken down by composition

| Site  | Construct | Sequence        | Glycans                 | Score  | XIC Occupied | XIC Unoccupied | occupancy |
|-------|-----------|-----------------|-------------------------|--------|--------------|----------------|-----------|
| T323  | HexaPro   | R.VQPtESIVR.F   | HexNAc(1)               | 176.05 | 5.91E+07     | 5.21E+11       | 0.01%     |
| T323  | HexaPro   | S.NFRVQPtESIV.R | HexNAc(1)               | 191.31 | 1.42E+08     | 3.00E+11       | 0.05%     |
| T323  | HexaPro   | R.VQPtESIVR.F   | HexNAc(1)               | 176.14 | 5.32E+07     | 6.25E+11       | 0.01%     |
| S1261 | HexaPro   | H.SAWsHPQFEK.-  | HexNAc(1)               | 201.3  | 2.65E+08     | 4.62E+09       | 5.42%     |
| S1261 | HexaPro   | HHHSAWSHPQFEK   | HexNAc(2)Hex(2)NeuAc(2) | 349.16 | 1.15E+07     | 1.63E+08       | 6.59%     |

**Table S1:** Unambiguously verified O-linked glycans in the Hexapro construct

**Figure S5: XIC, precursor spectra, and fragmentation spectra of manually verified true positive O-linked glycans for the kifunensine treated spike HexaPro construct**  
**HexaPro - T323**

T323  
 Sequence = VQPTESIVR; Mods = OGlycan/203.0794 z=2  
 Glycan = HexNAc(1)  
 Score = 176.05  
 XIC Area = 5.91e+7; XIC % Mod = 0.011  
 Expected m/z = 616.3301; Obs m/z = 616.3304  
 Error (ppm) = 0.61  
 Retention Time (min) = 65.21  
 InSilico status:

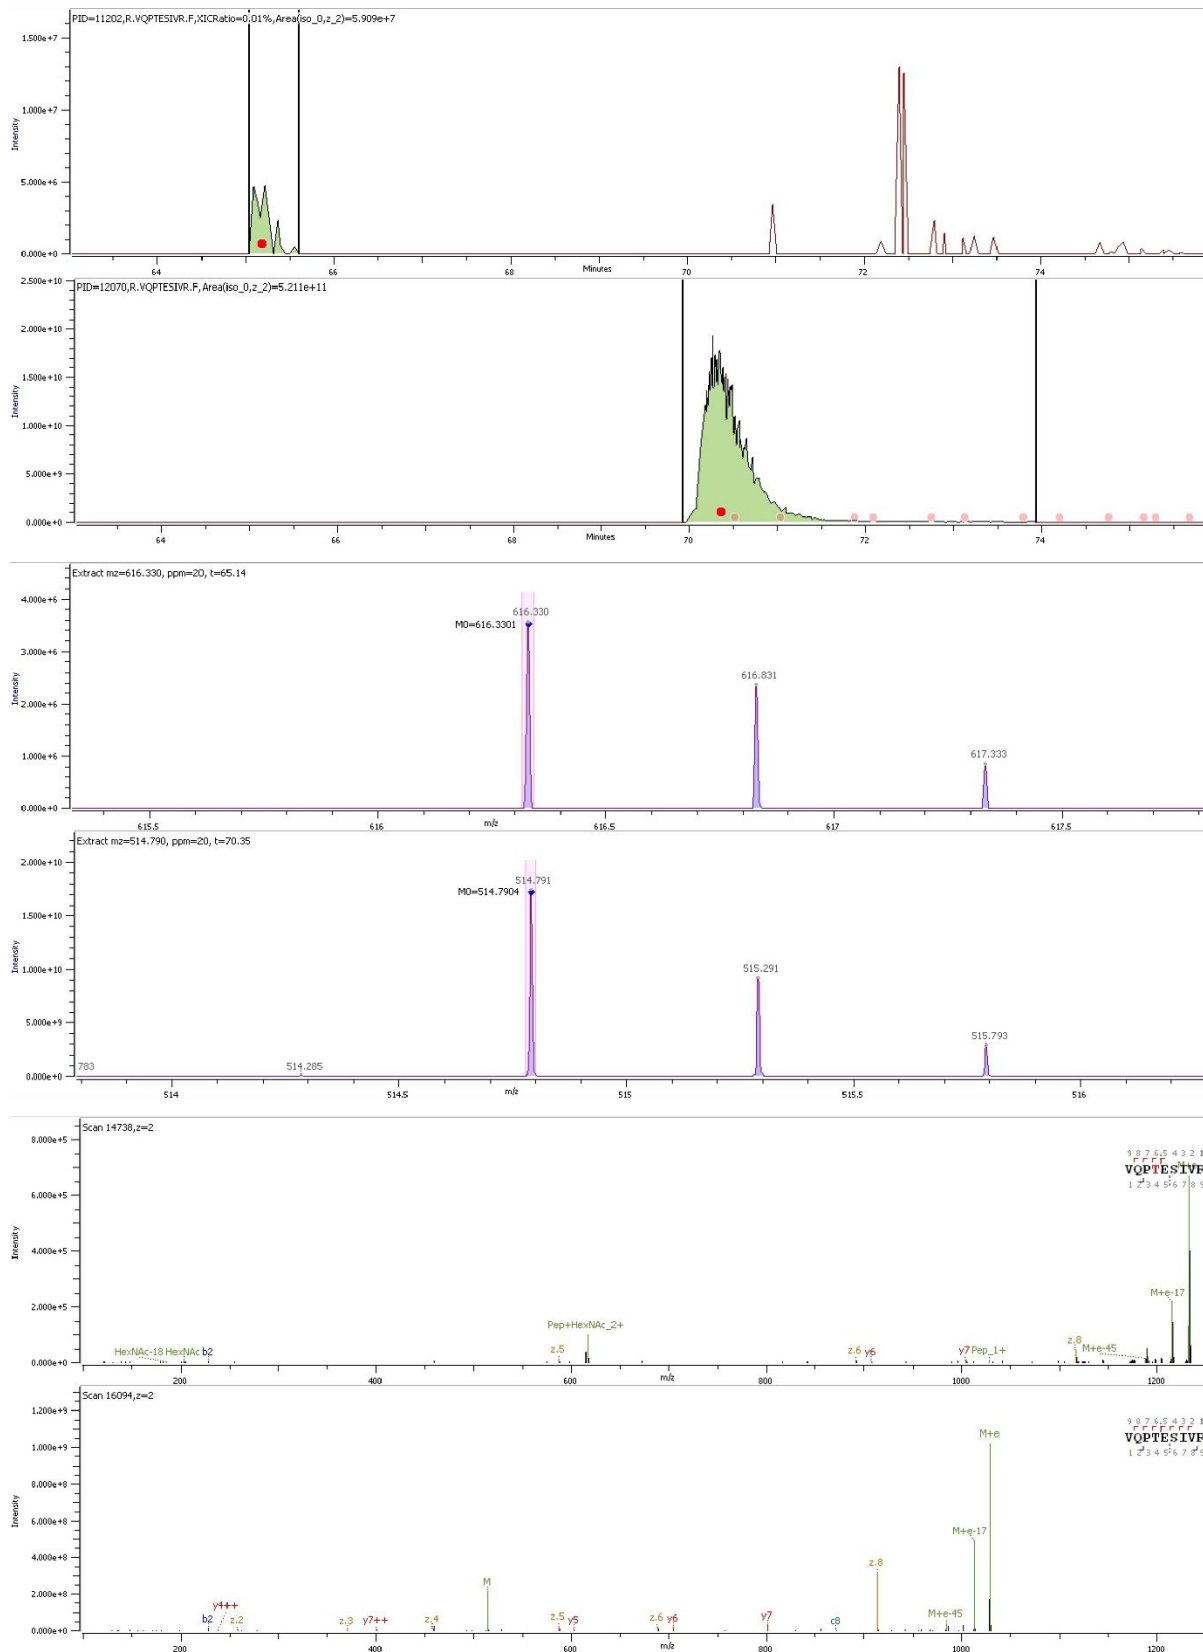

# HexaPro - T323

T323  
 Sequence = VQPTEISIVR; Mods = OGlycan203.0794 z=2  
 Glycan = HexNAc(1)  
 Score = 176.14  
 XIC Area = 5.32e+7; XIC % Mod = 0.009  
 Expected m/z = 616.3301; Obs m/z = 616.3301  
 Error (ppm) = 0.02  
 Retention Time (min) = 63.90  
 InSilico status:

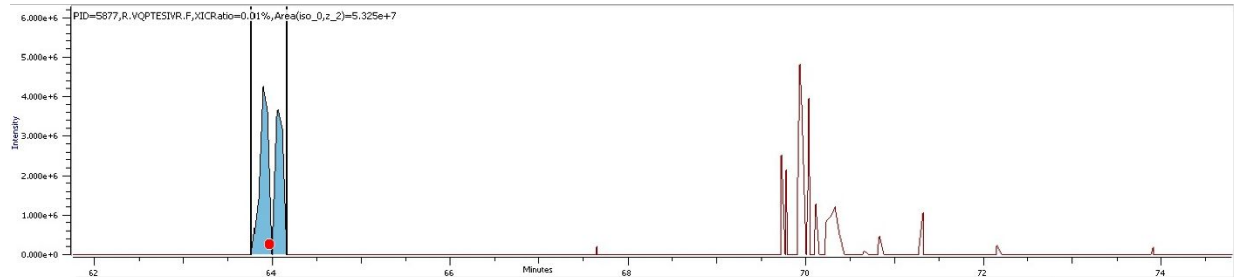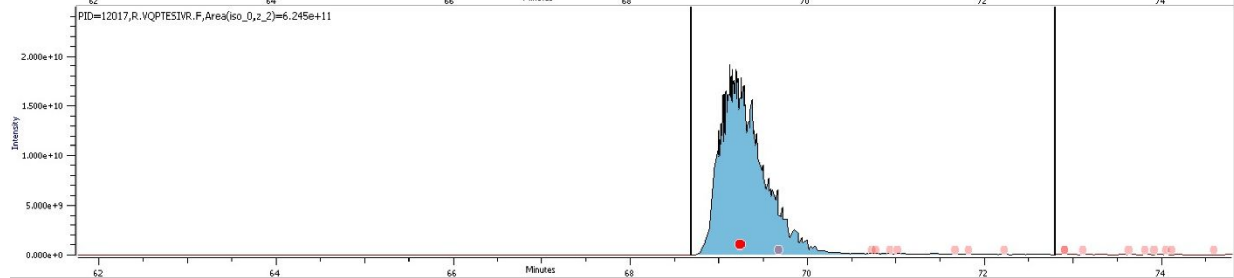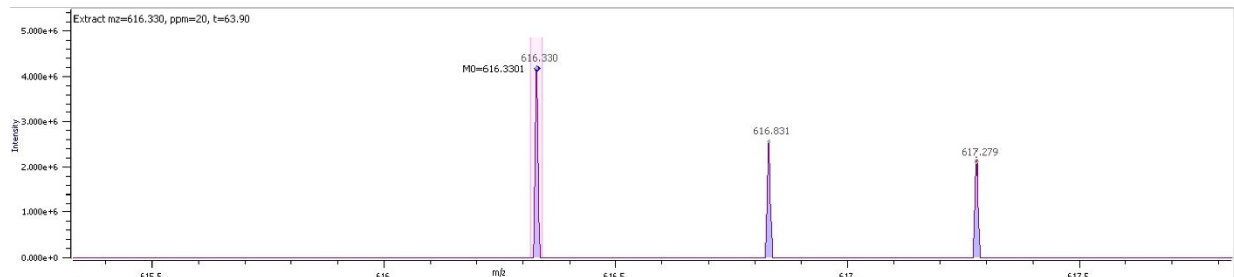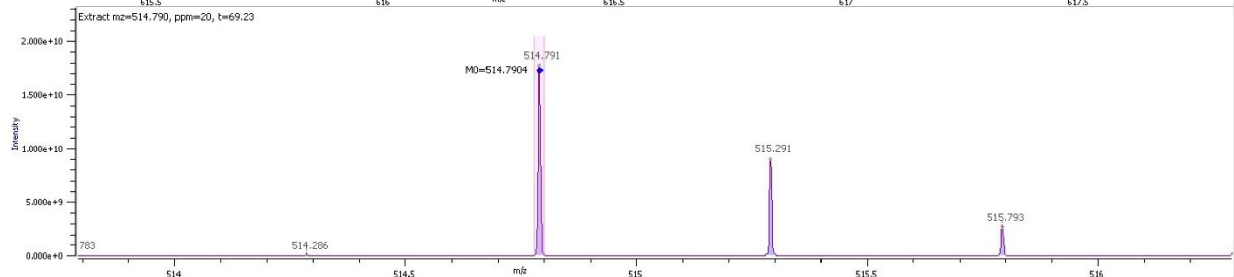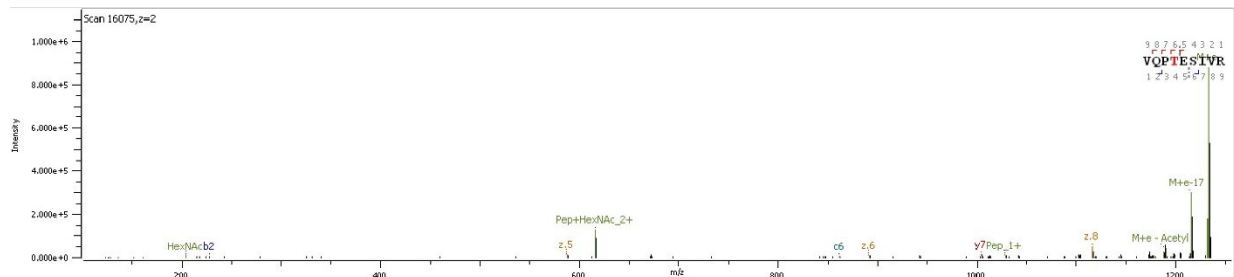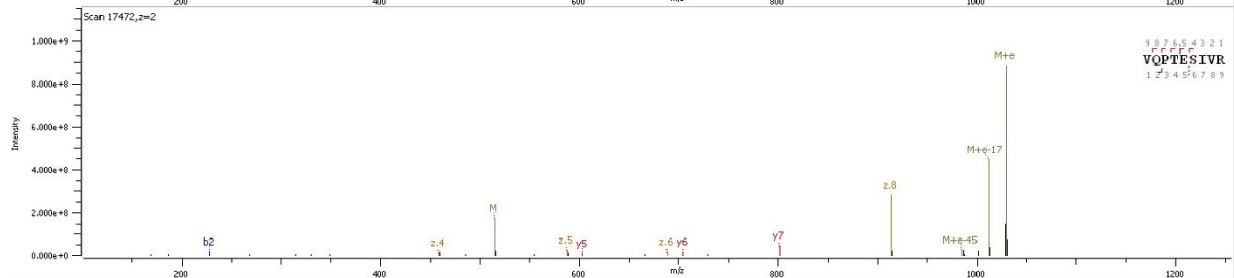

# HexaPro - T323

T323

Sequence = NFRVQPTESIV; Mods = Oglycan203.0794 z=2

Glycan = HexNAc(1)

Score = 191.31

XIC Area = 1.42e+8; XIC % Mod = 0.047

Expected m/z = 746.8857; Obs m/z = 746.8862

Error (ppm) = 0.62

Retention Time (min) = 104.83

InSilico status:

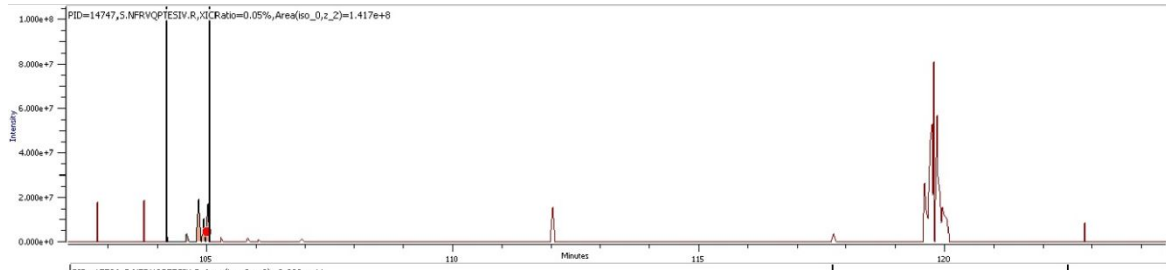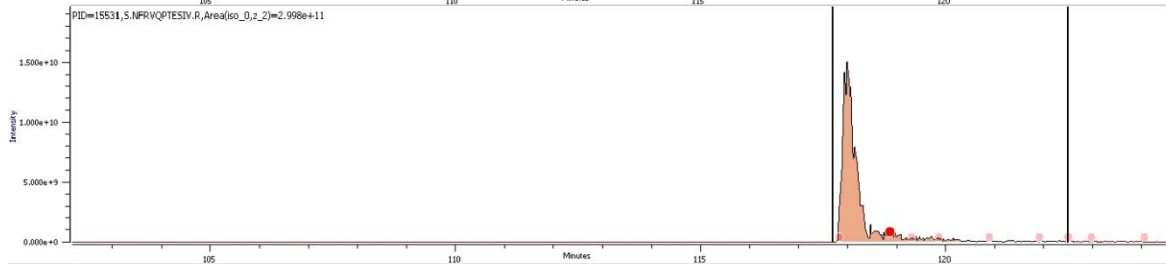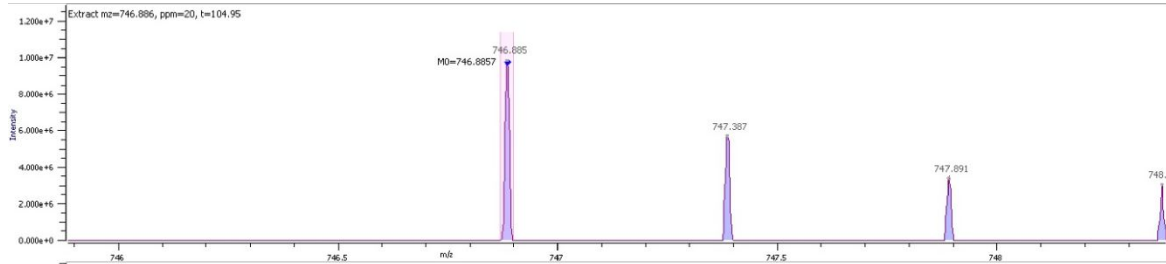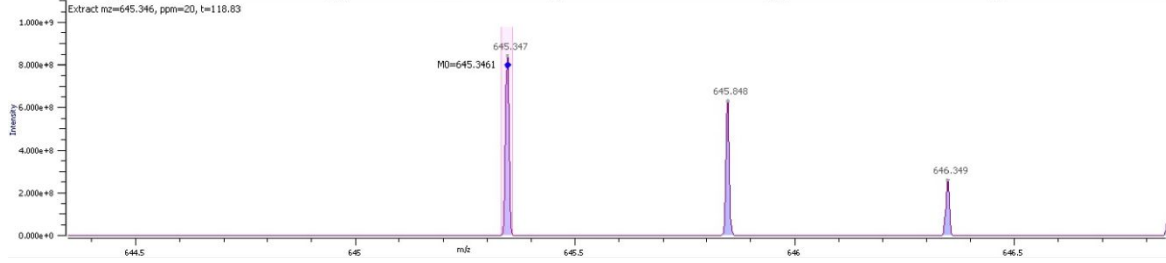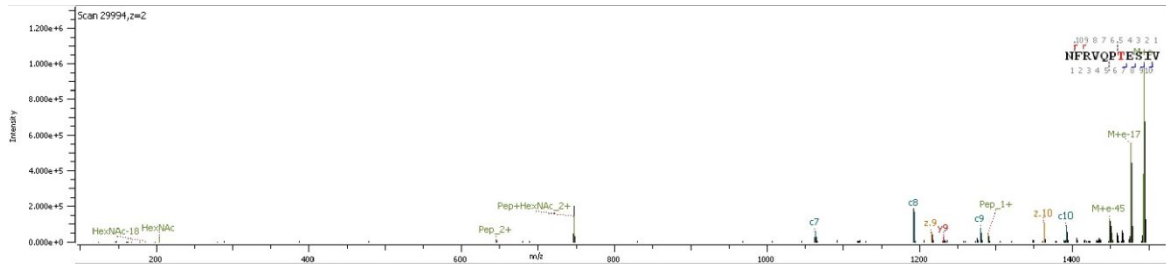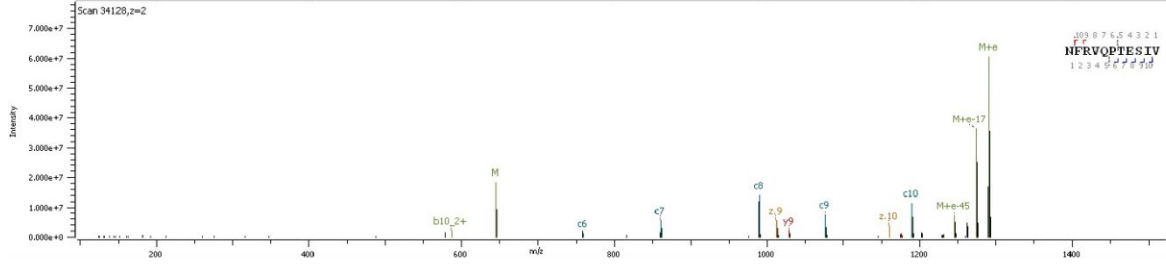

# HexaPro - S1261

S1261  
Sequence = SAWSHPQFEK; Mods = OGlycan203.0794 z=3  
Glycan = HexNAc(1)  
Score = 201.30  
XIC Area = 2.65e+8; XIC % Mod = 6.112  
Expected m/z = 473.8895; Obs m/z = 473.8896  
Error (ppm) = 0.14  
Retention Time (min) = 72.94  
InSilico status:

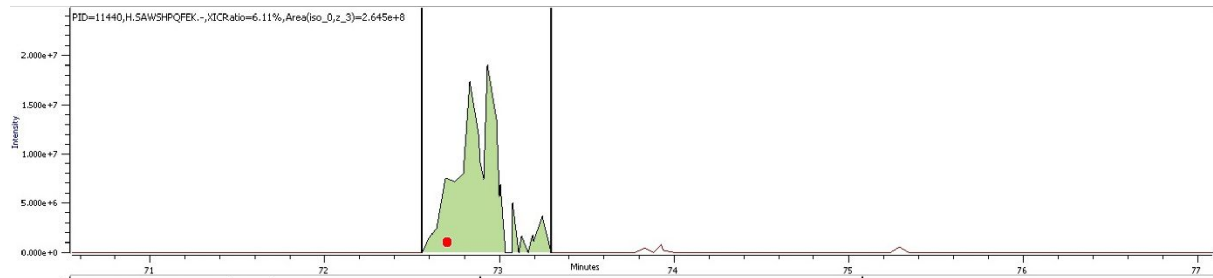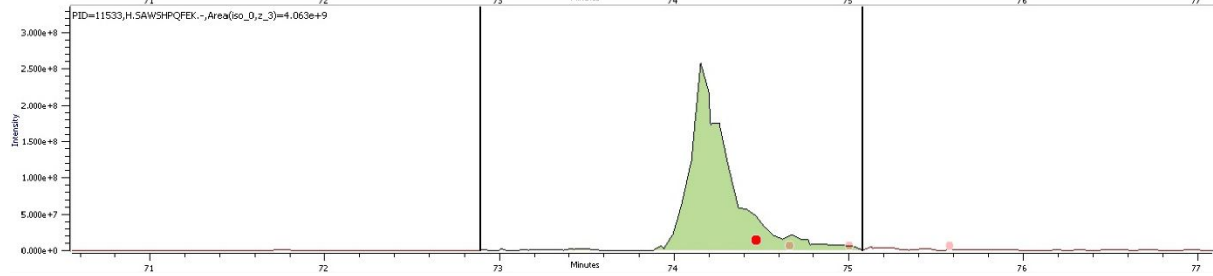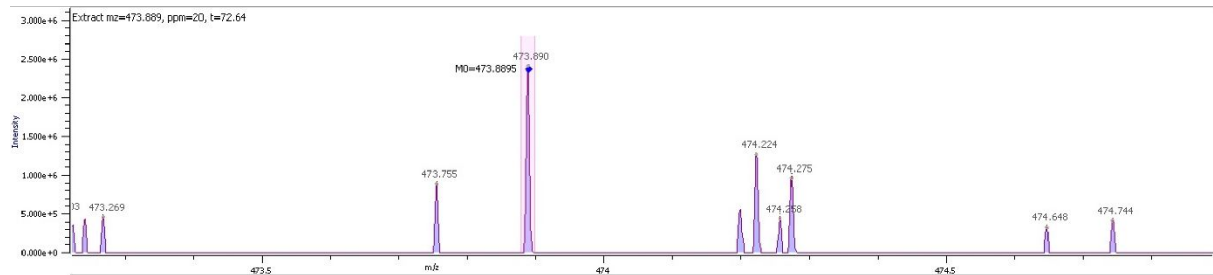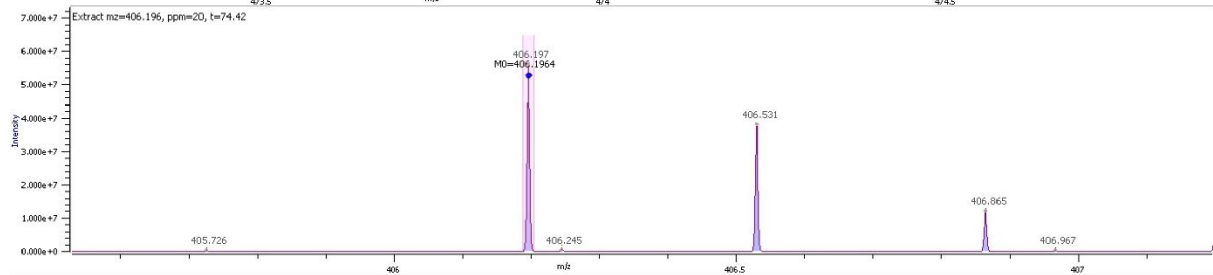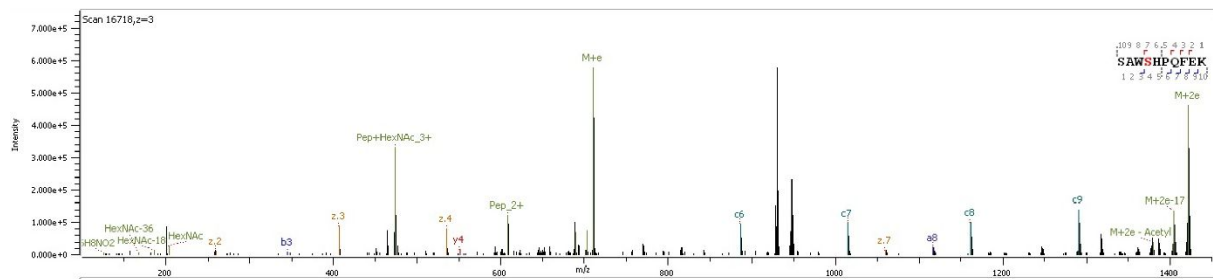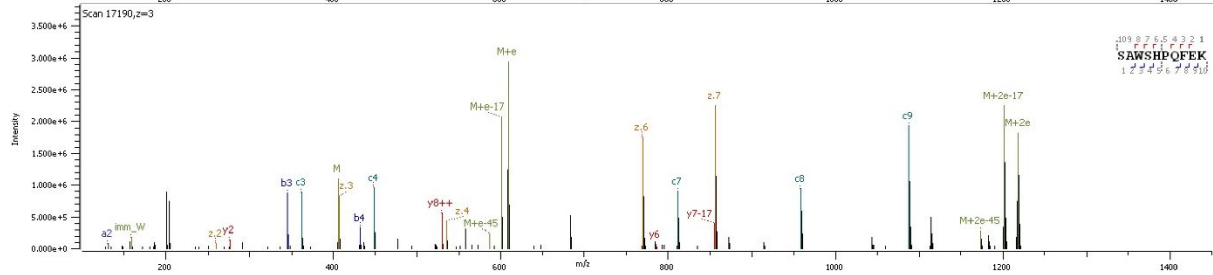



# HexaPro - S1261

S1261  
Sequence = HHHSWSHPQFEK; Mods = OGlycan/1312.4552 z=4  
Glycan = HexNAc(2)Hex(2)NeuAc(2)  
Score = 349.16  
XIC Area = 1.15e+7; XIC % Mod = 6.613  
Expected m/z = 735.8071; Obs m/z = 735.8071  
Error (ppm) = 0.02  
Retention Time (min) = 60.62  
InSilico status:

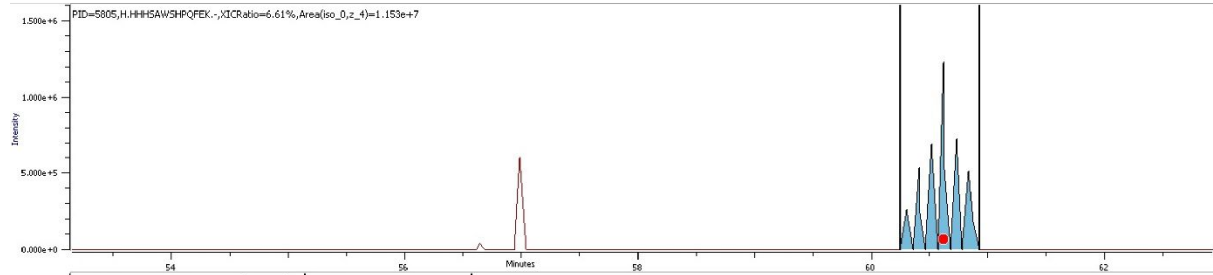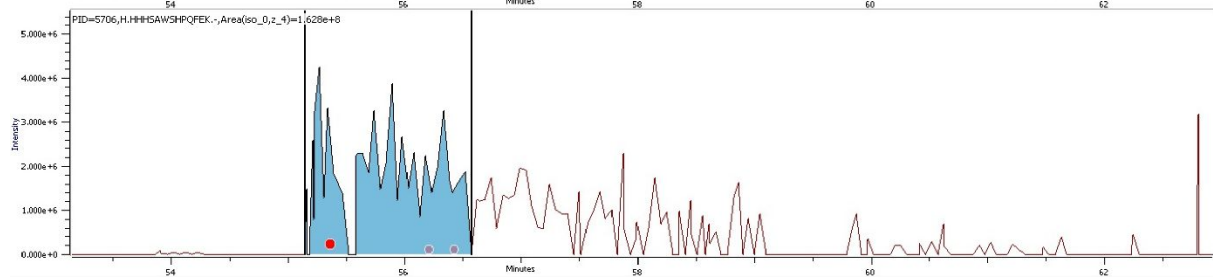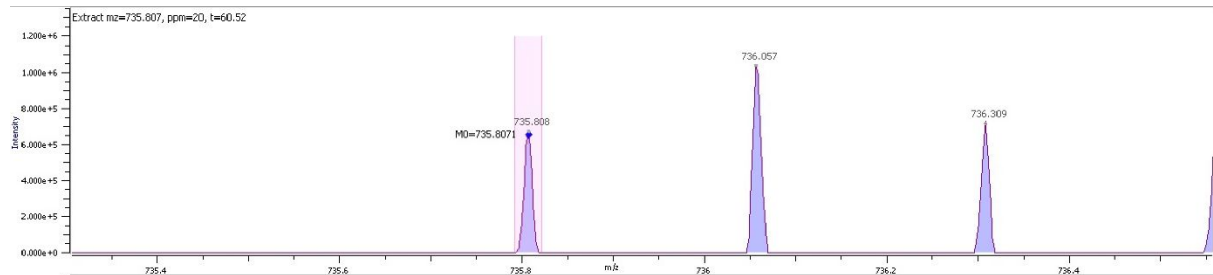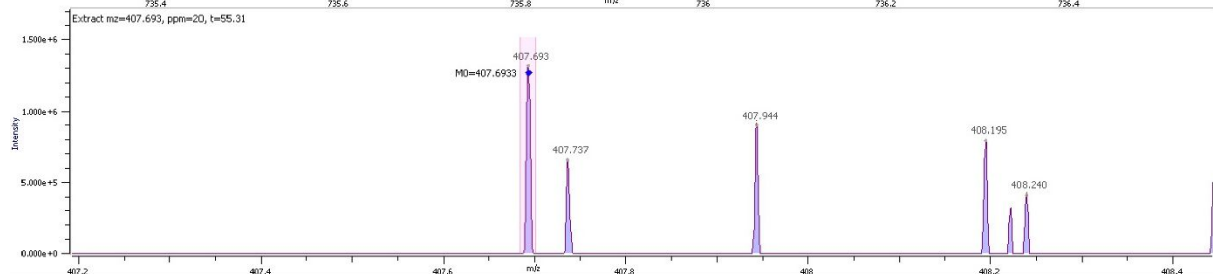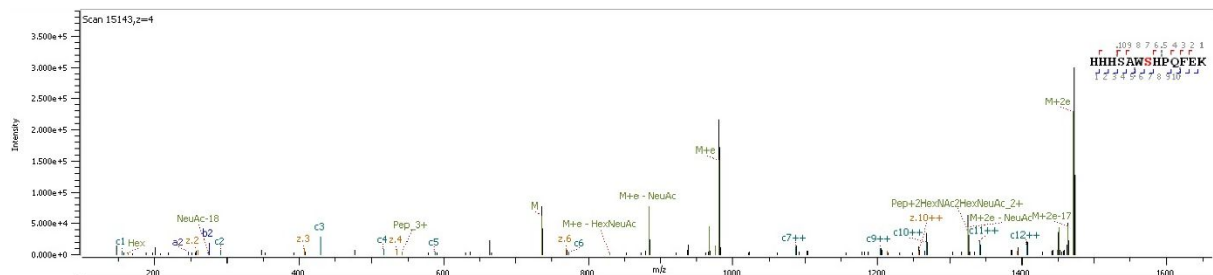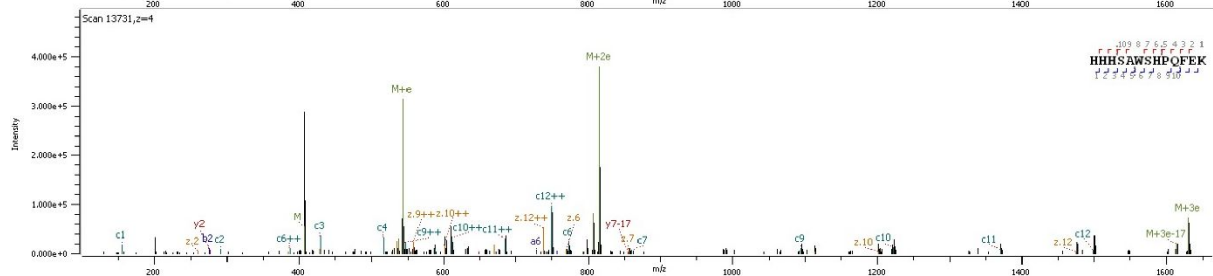

| Site  | Construct | Sequence          | Glycans                 | Score              | XIC Occupied | XIC Unoccupied | occupancy |
|-------|-----------|-------------------|-------------------------|--------------------|--------------|----------------|-----------|
| T323  | 2P        | S.NFRVQPtESIV.R   | HexNAc(1)               | 170.59             | 3.22E+08     | 6.77E+10       | 0.47%     |
| T323  | 2P        | R.VQPtESIV.R.F    | HexNAc(1)               | 197.33             | 5.36E+08     | 3.01E+11       | 0.18%     |
| T323  | 2P        | F.RVQPtESIV.R     | HexNAc(1)               | 192.53             | 1.07E+08     | 6.77E+10       | 0.16%     |
| T323  | 2P        | F.RVQPtESIV.R     | HexNAc(1)               | 171.6              | 3.40E+07     | 6.55E+10       | 0.05%     |
| S1261 | 2P        | H.HHSAWshPQFEK.-  | HexNAc(1)               | 234.20 -<br>531.98 | 5.25E+08     | 5.55E+09       | 8.64%     |
| S1261 | 2P        | H.HHSAWshPQFEK.-  | HexNAc(1)Hex(1)NeuAc(2) | 82.57 -<br>142.57  | 9.41E+07     | 5.55E+09       | 2.00%     |
| S1261 | 2P        | H.HHHSAWshPQFEK.- | HexNAc(1)Hex(1)NeuAc(2) | 307.88 -<br>480.37 | 1.23E+09     | 8.14E+08       | 56.89%    |
| S1261 | 2P        | H.SAWshPQFEK.-    | HexNAc(1)               | 196.52             | 1.98E+09     | 2.04E+10       | 7.23%     |
| S1261 | 2P        | S.AWshPQFEK.-     | HexNAc(1)               | 279.7              | 1.12E+07     | 5.14E+08       | 2.13%     |

**Table S2:** Unambiguously verified O-linked glycans in the 2P construct

# Figure S6: XIC, precursor spectra, and fragmentation spectra of manually verified true positive O-linked glycans for the kifunensine treated spike 2P construct 2P - T323

T323  
 Sequence = RVQPTESIV; Mods = Oglycan/203.0794 z=2  
 Glycan = HexNAc(1)  
 Score = 192.53  
 XIC Area = 1.07e+8; XIC % Mod = 0.158  
 Expected m/z = 616.3301; Obs m/z = 616.3307  
 Error (ppm) = 1.01

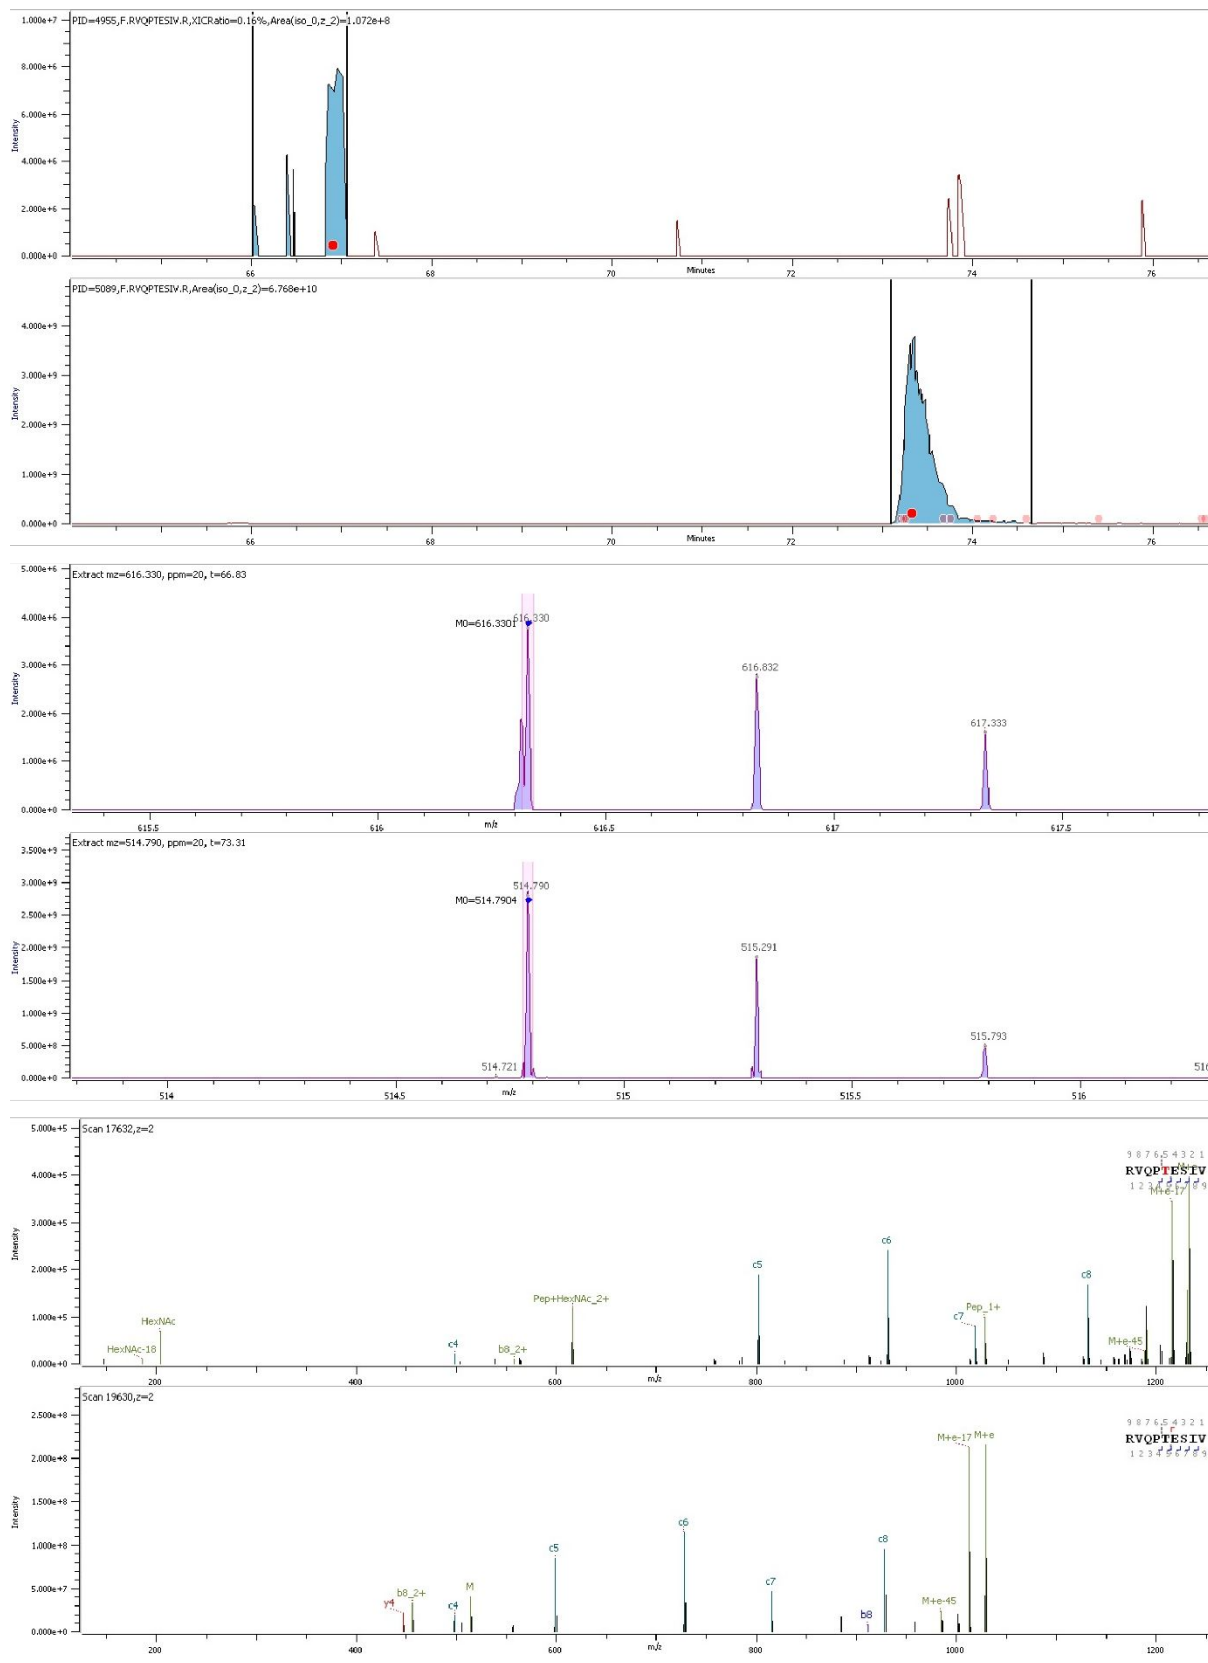

# 2P - T323

T323

Sequence = NFRVQPTESIV; Mods = Oglycan203.0794 z=2

Glycan = HexNAc(1)

Score = 170.59

XIC Area = 3.22e+8; XIC % Mod = 87.741

Expected m/z = 746.8857; Obs m/z = 746.8860

Error (ppm) = 0.41

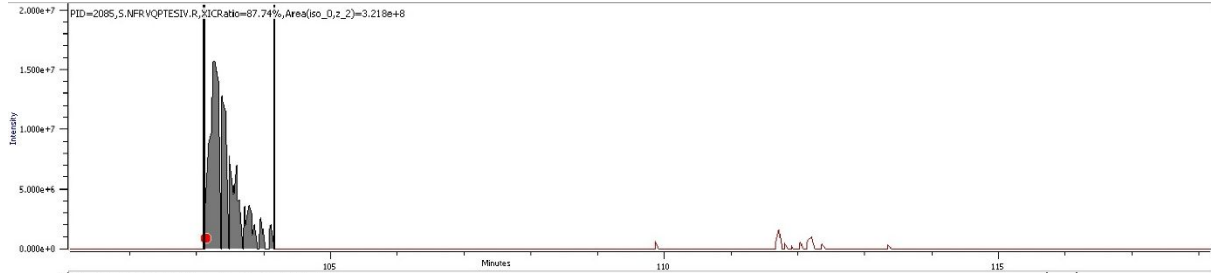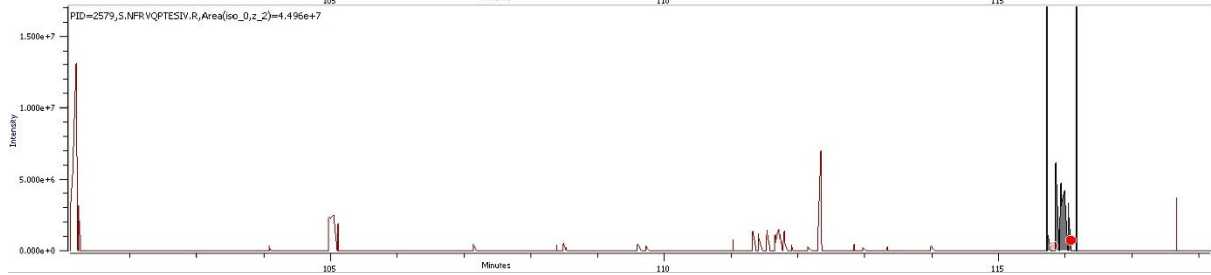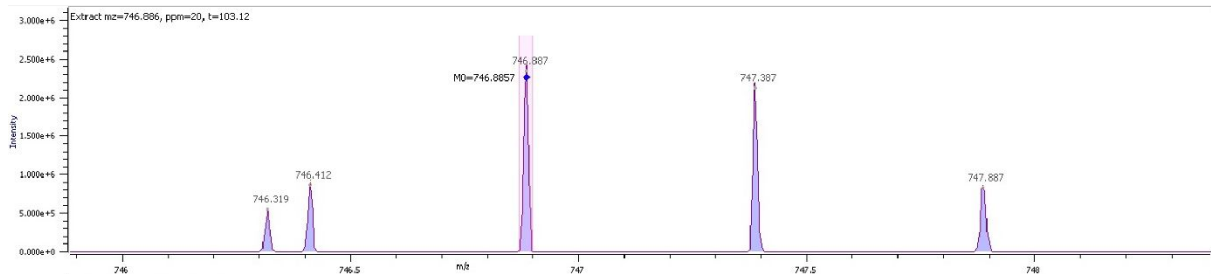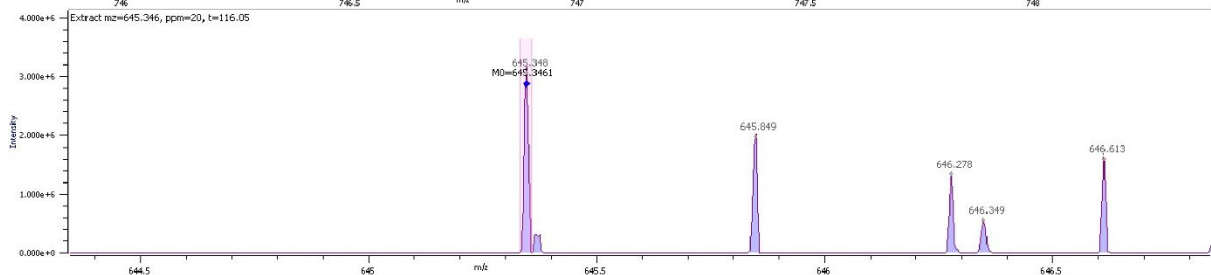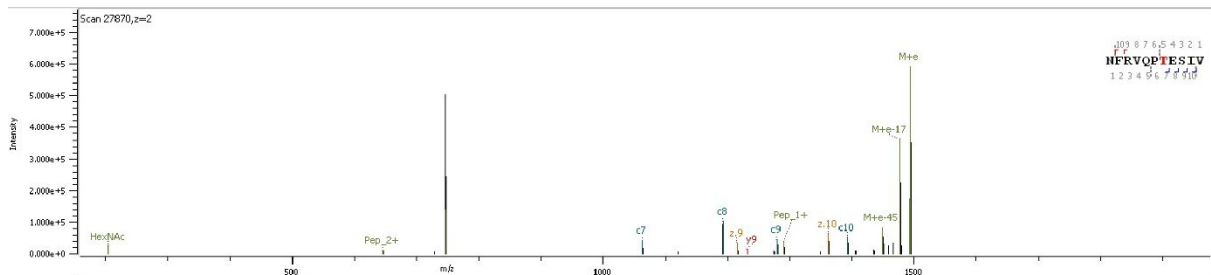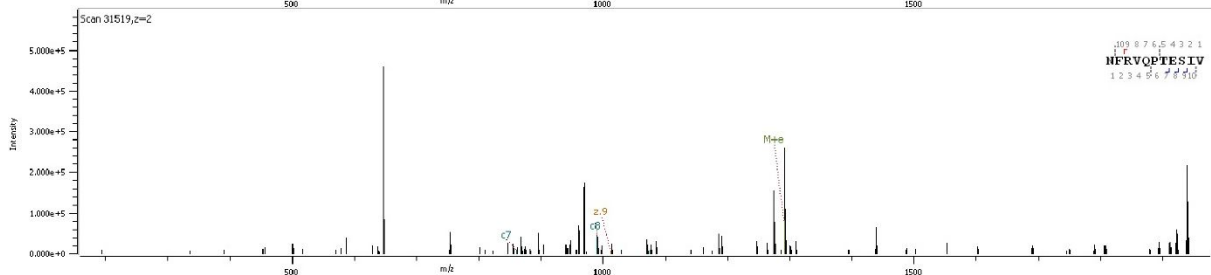

# 2P - T323

T323

Sequence = VQPTESIVR; Mods = OGlycan/203.0794 z=2

Glycan = HexNAc(1)

Score = 197.33

XIC Area = 5.36e+8; XIC % Mod = 0.177

Expected m/z = 616.3301; Obs m/z = 616.3301

Error (ppm) = 0.12

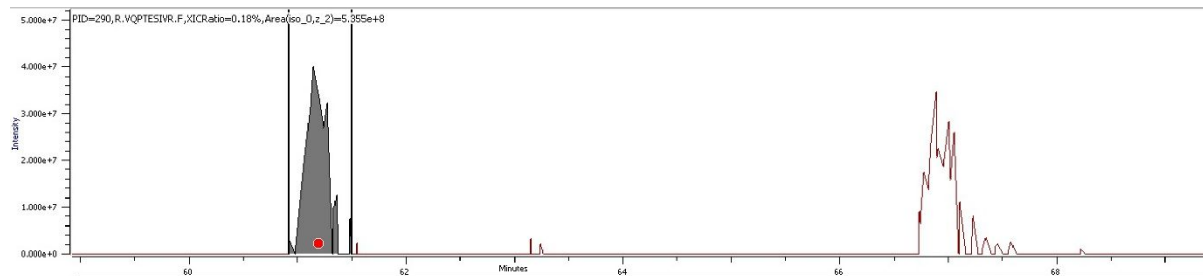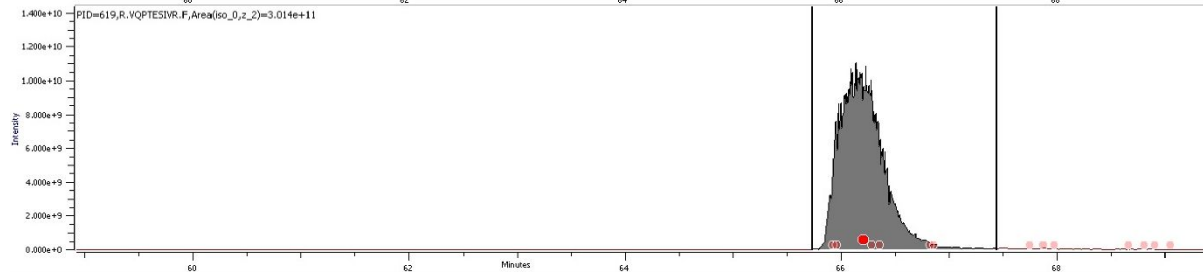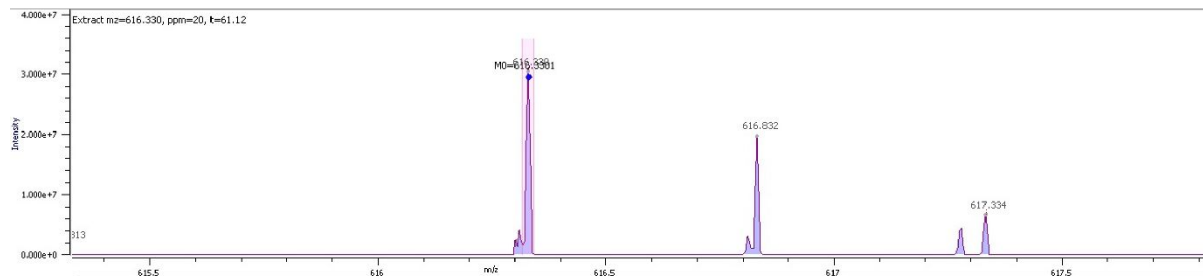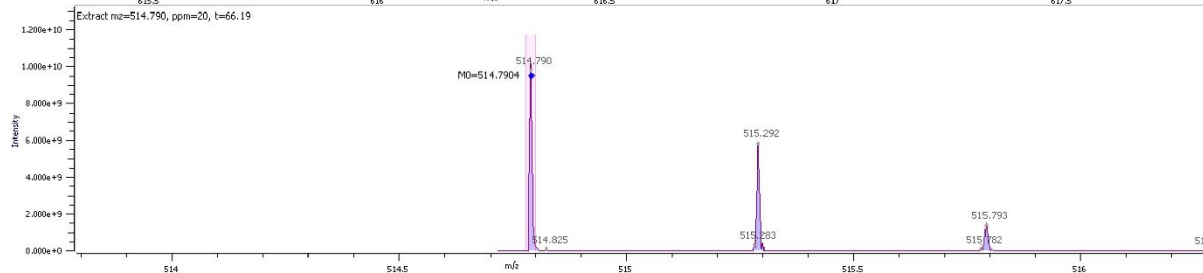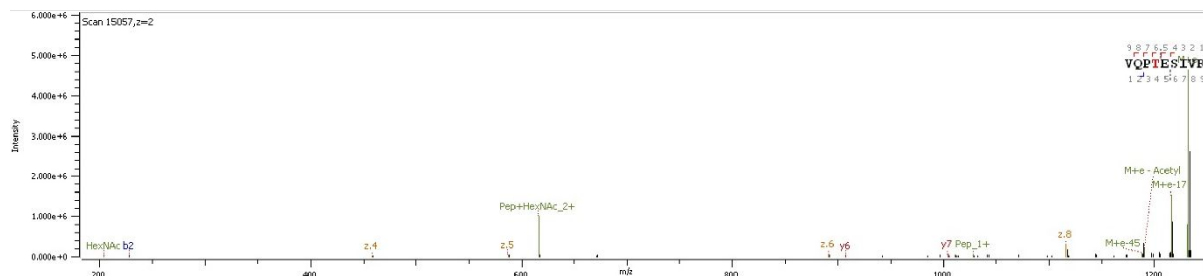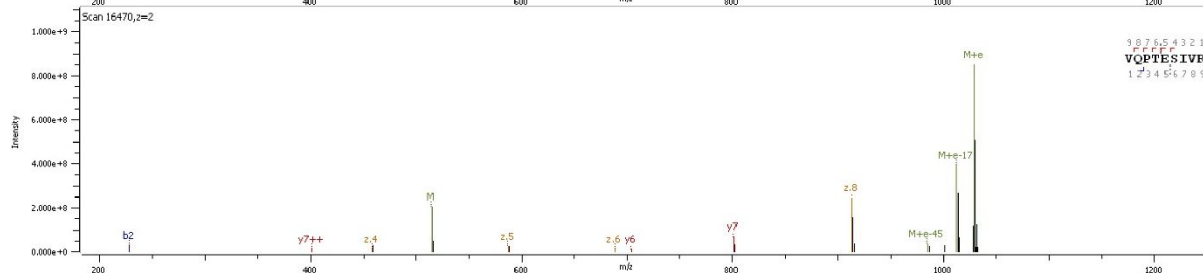

# 2P - T323

T323

Sequence = RVQPTEIV; Mods = Oglycan/203.0794 z=2

Glycan = HexNAc(1)

Score = 171.60

XIC Area = 3.4e+7; XIC % Mod = 0.052

Expected m/z = 616.3301; Obs m/z = 616.3304

Error (ppm) = 0.51

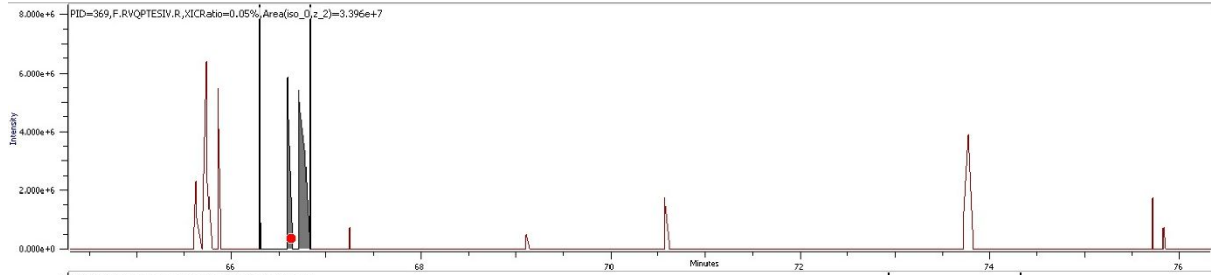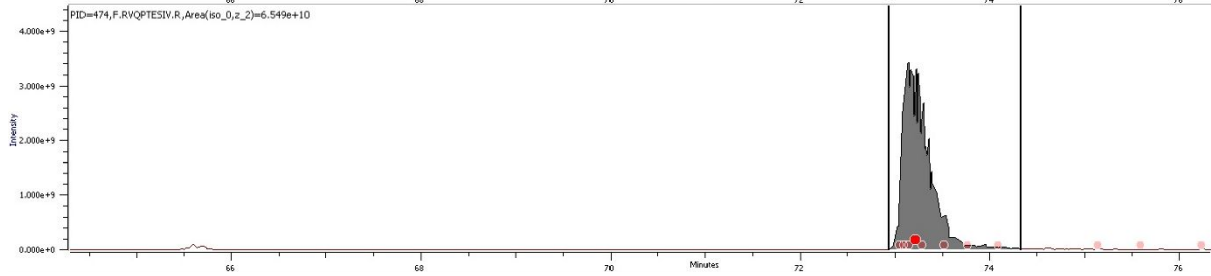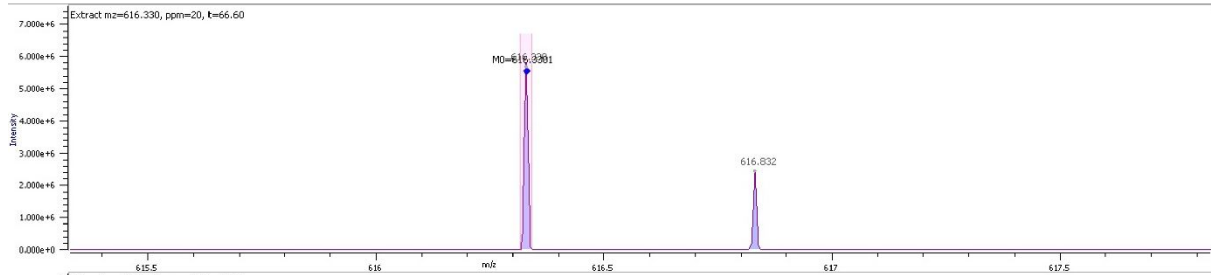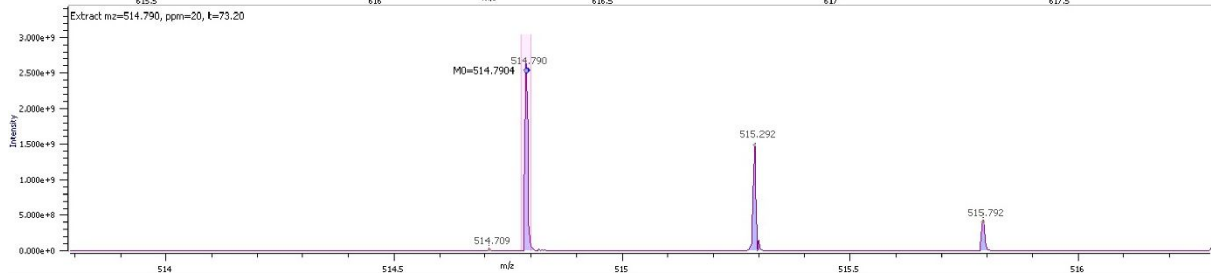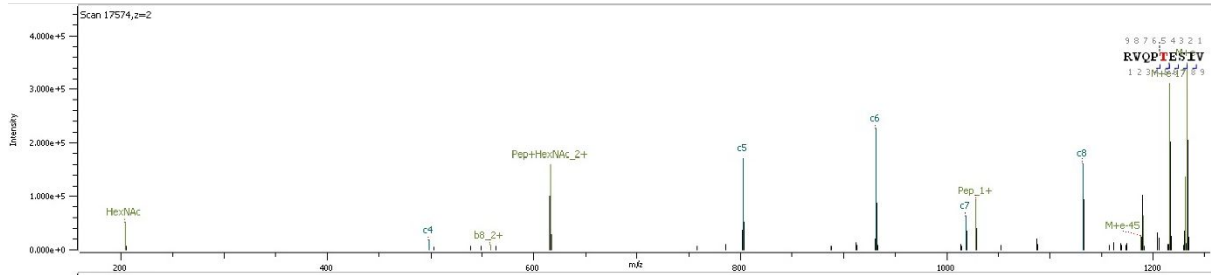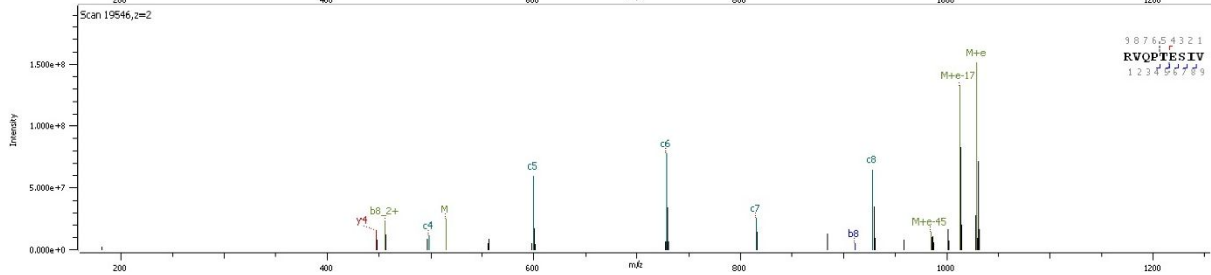

# 2P - S1261

S1261  
Sequence - HHSAWSHPQFEK; Mods - OGlycan203.0794 z=4  
Glycan - HexNAc(1)  
Score = 234.20 - 531.98  
XIC Area = 5.25e+8; XIC % Mod = 8.767  
Expected m/z = 458.4631; Obs m/z = 458.4631 - 458.4633  
Error (ppm) = 0.43; 0.30; -0.04

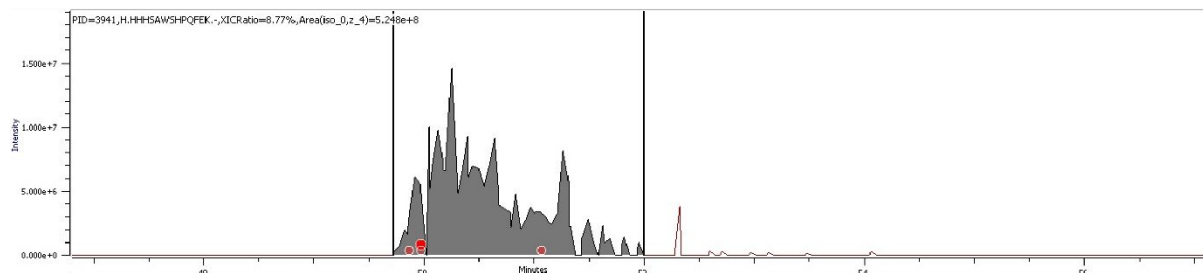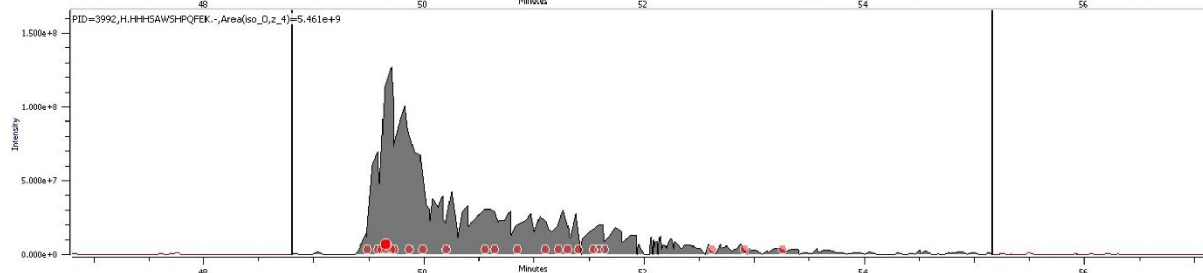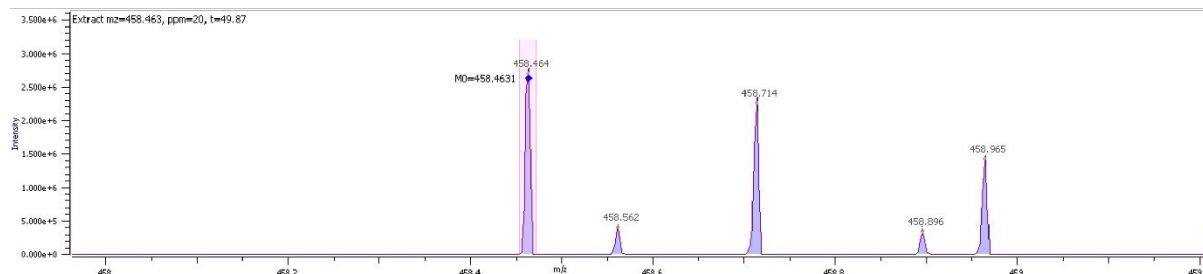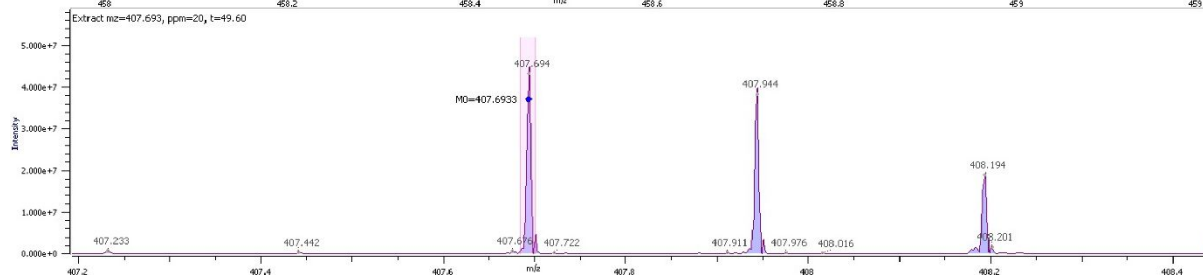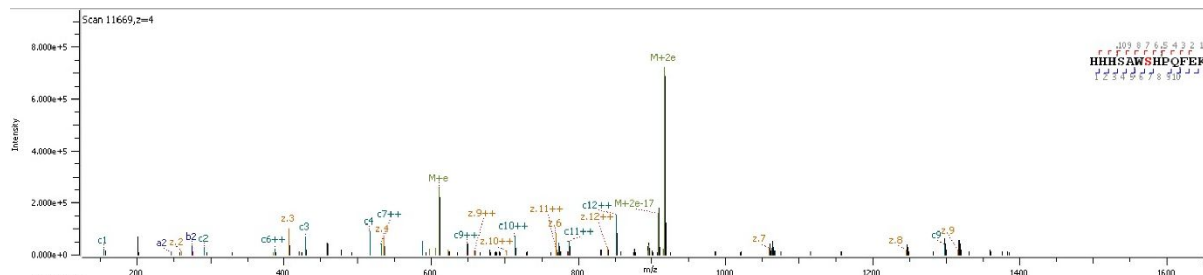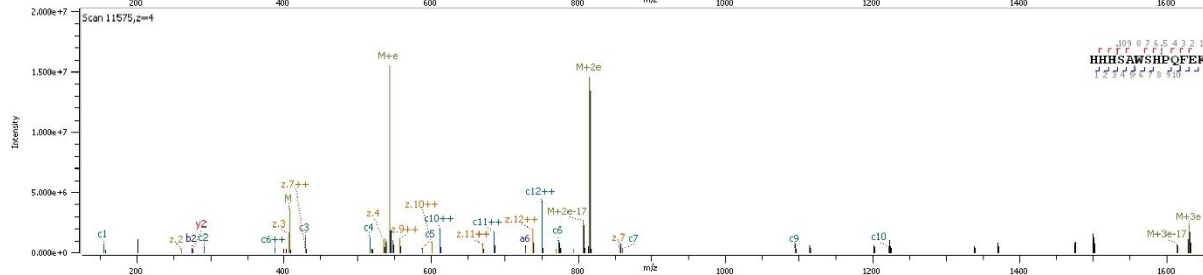

# 2P - S1261

S1261

Sequence - HHHSWSHPQFEK; Mods - OGlcan/947.3230 z=4

Glycan = HexNAc(1)Hex(1)NeuAc(2)

Score = 57.17 - 117.17

XIC Area = 9.41e+7; XIC % Mod = 1.694

Expected m/z = 644.5240; Obs m/z = 644.5247

Error (ppm) = 1.10

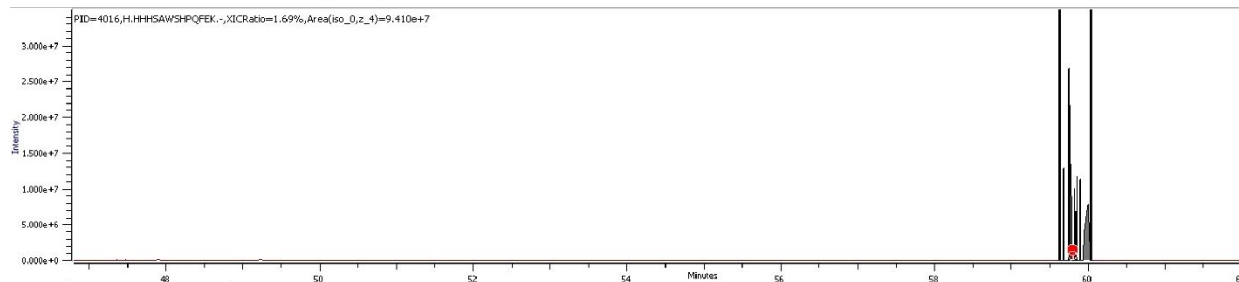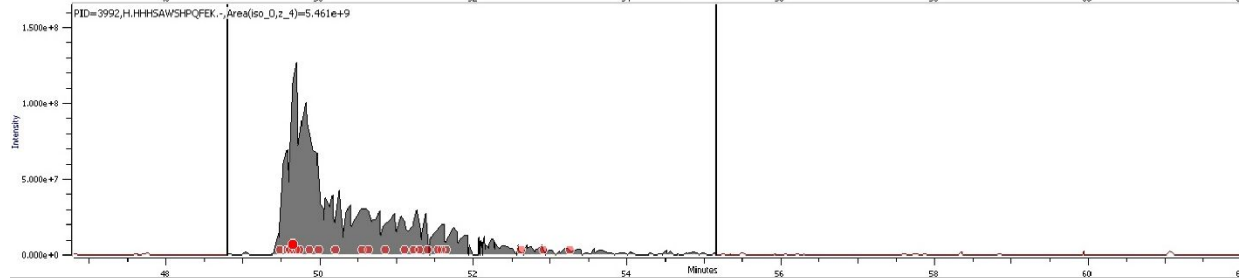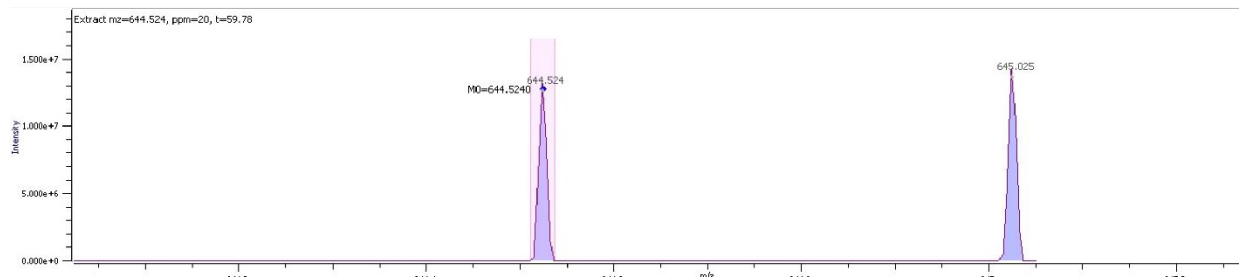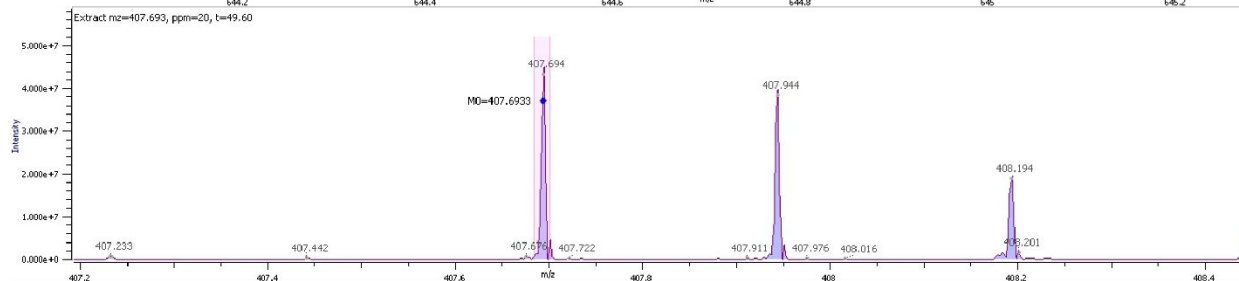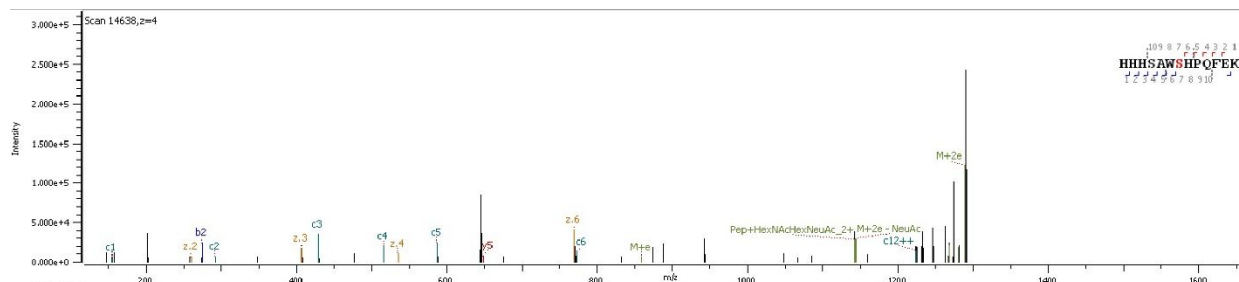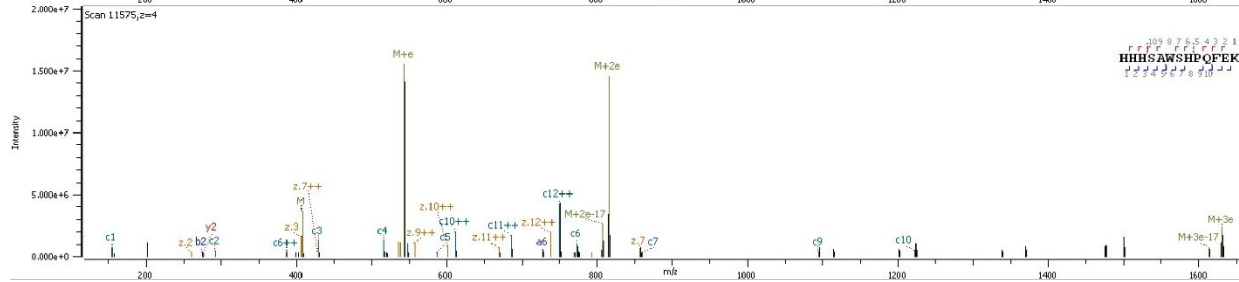



# 2P - S1261

S1261

Sequence = SAWSHPQFEK; Mods = Oglycan/203.0794 z=3

Glycan = HexNAc(1)

Score = 196.52

XIC Area = 1.98e+9; XIC % Mod = 8.874

Expected m/z = 473.8895; Obs m/z = 473.8899

Error (ppm) = 0.86

Retention Time (min) = 68.88

InSilico status:

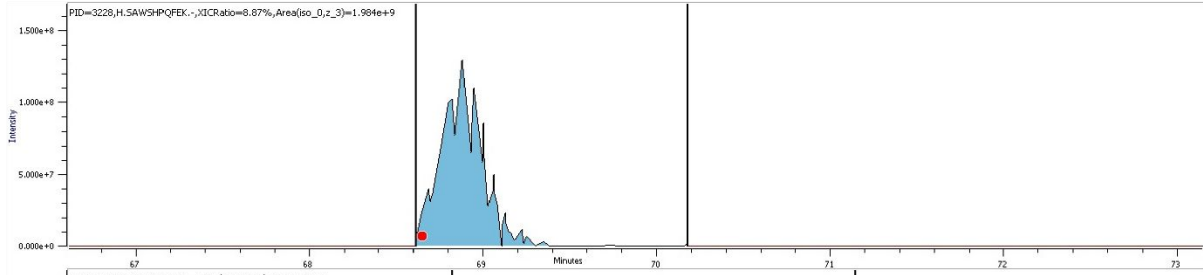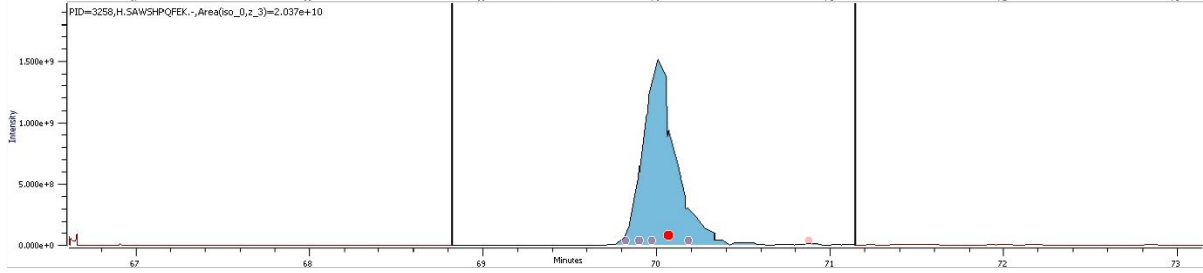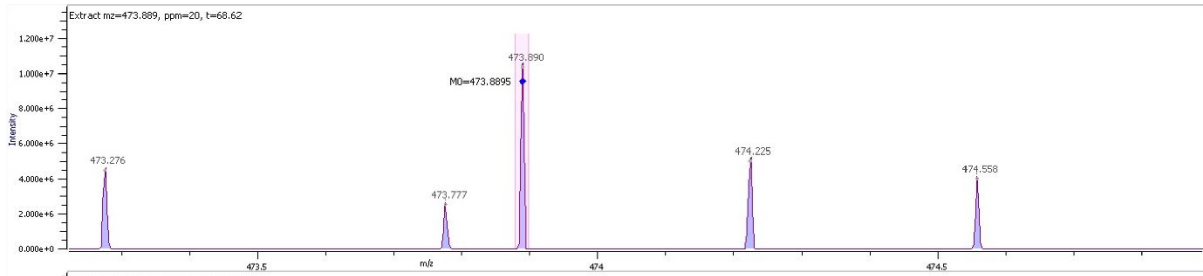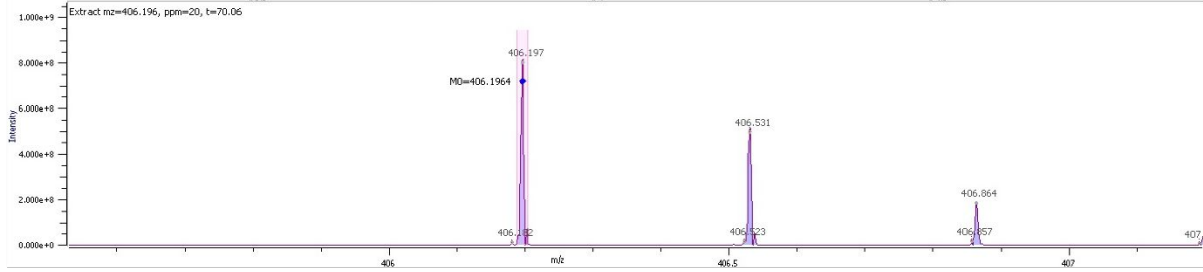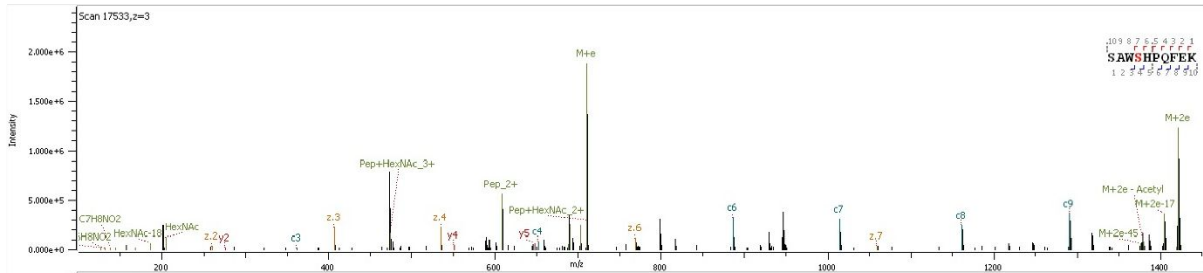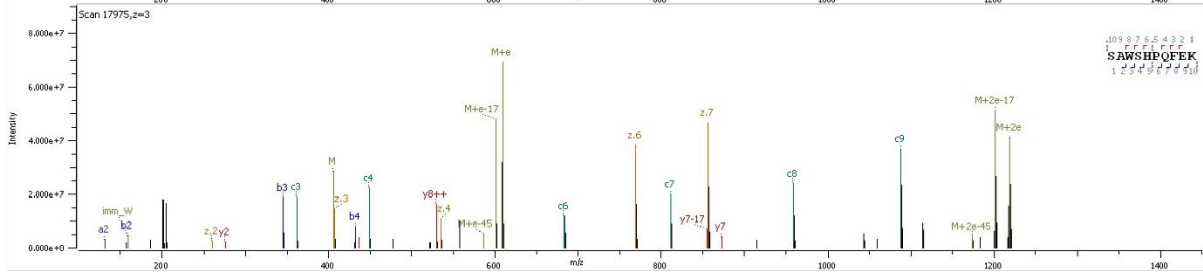

# 2P - S1261

S1261  
 Sequence = SAWSHPQFEK; Mods = Oglycan/203.0794 z=3  
 Glycan = HexNAc(1)  
 Score = 196.52  
 XIC Area = 1.98e+9; XIC % Mod = 8.874  
 Expected m/z = 473.8895; Obs m/z = 473.8899  
 Error (ppm) = 0.86  
 Retention Time (min) = 68.88  
 InSilico status:

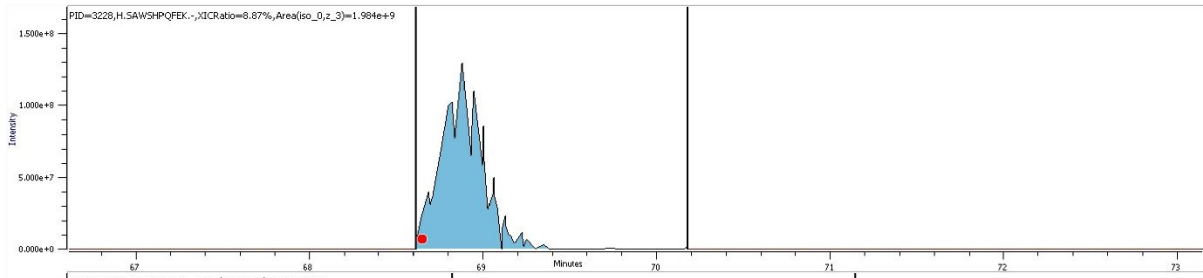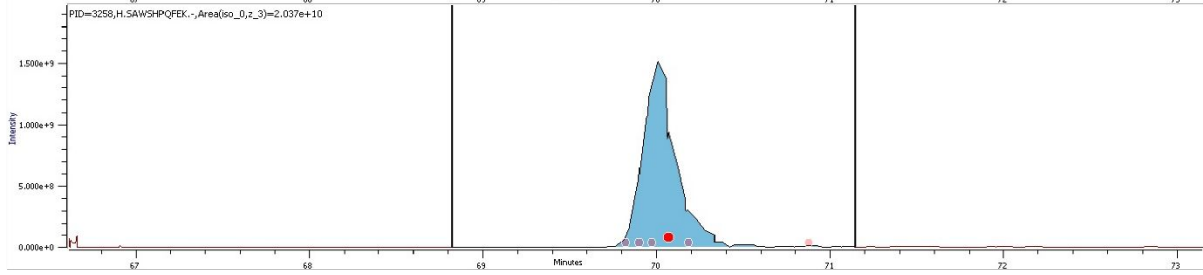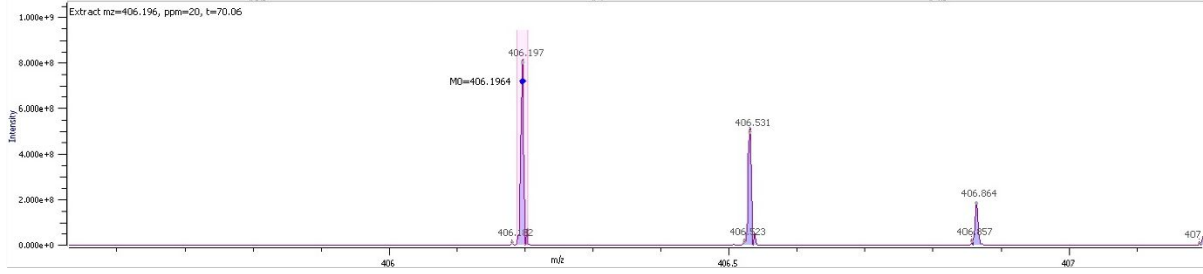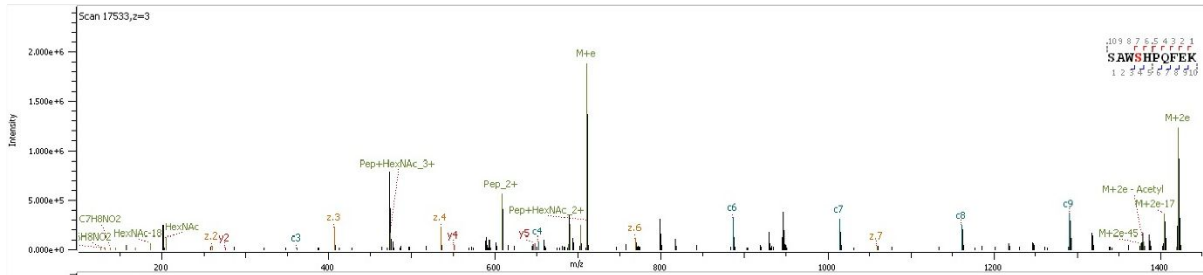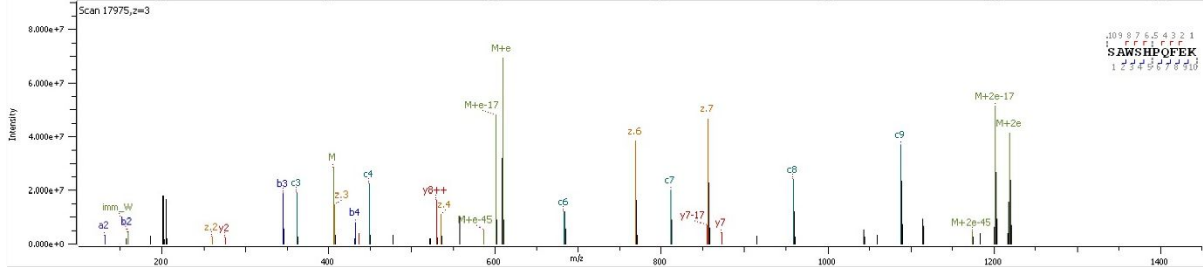

# 2P - S1261

S1261

Sequence = HHHHSAWSHPQFEK; Mods = Oglycan<sup>947.3230</sup> z=4

Glycan = HexNAc(1)Hex(1)NeuAc(2)

Score = 480.37

XIC Area = 4.27e+8; XIC % Mod = 34.400

Expected m/z = 678.7888; Obs m/z = 678.7898

Error (ppm) = 1.46

Retention Time (min) = 56.50

InSilico status:

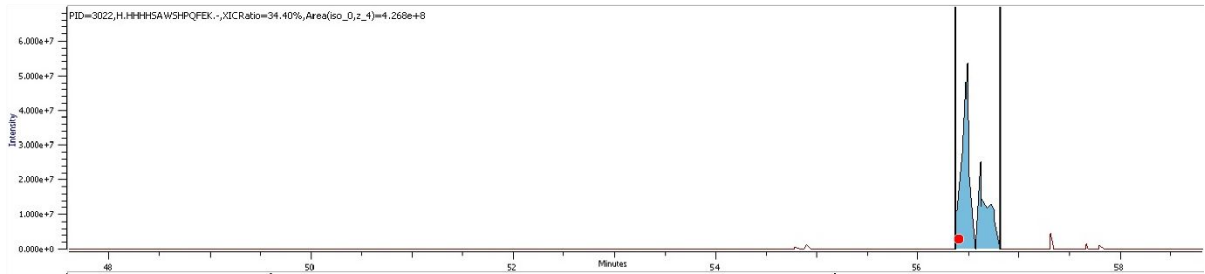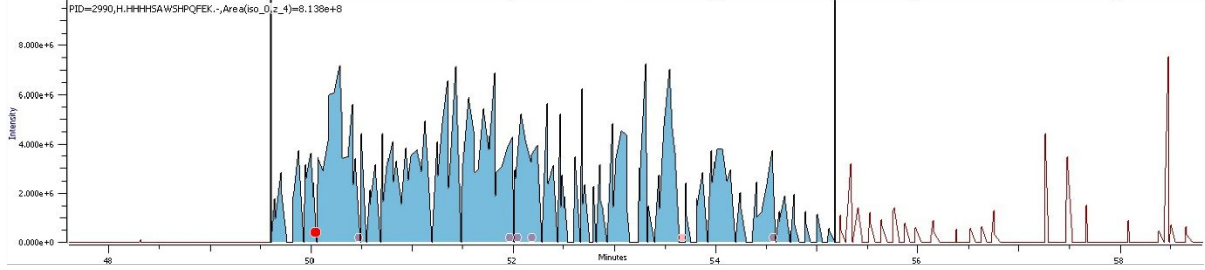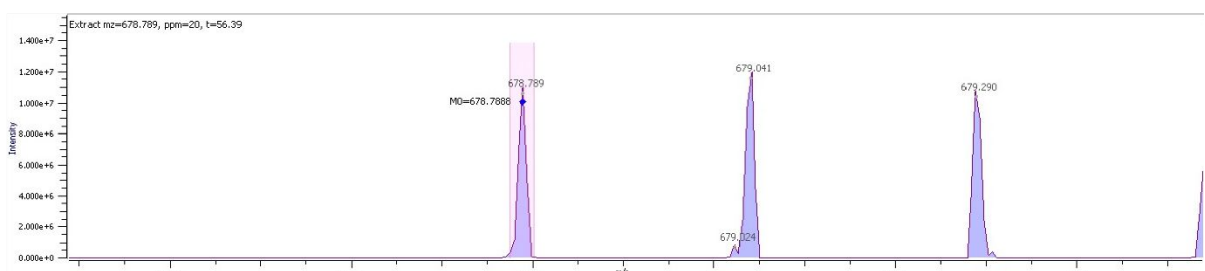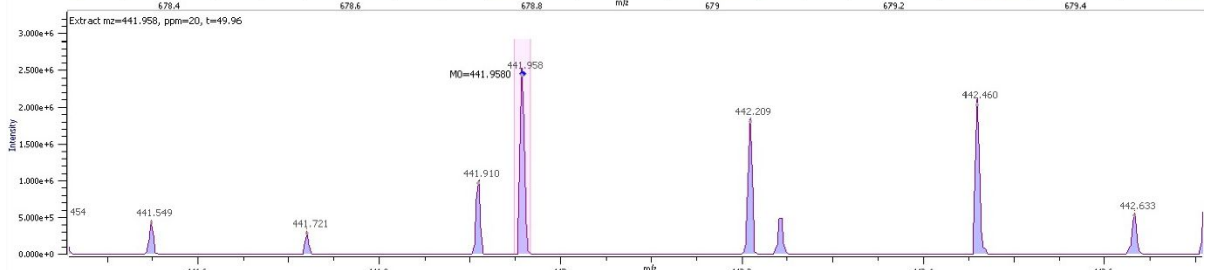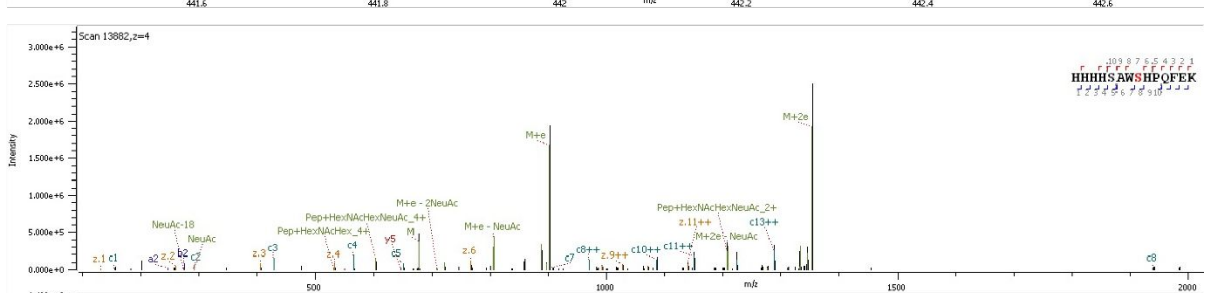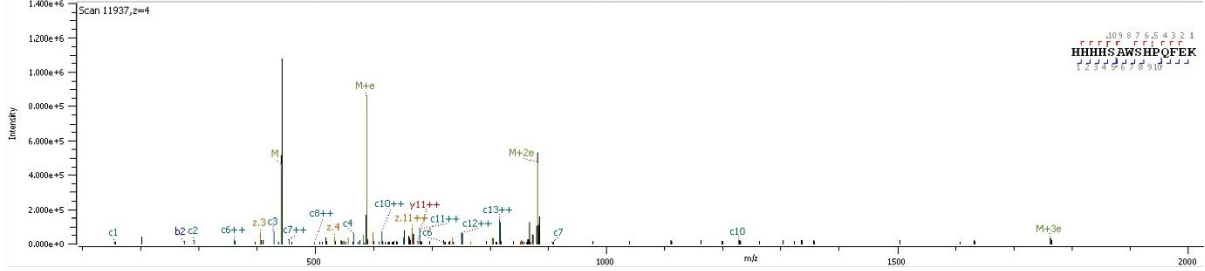



**Figure S 7: XIC, precursor spectra, and fragmentation spectra of ambiguous O-linked glycans form both HexaPro and 2P S protein constructs**

### HexaPro - T124

T124  
 Sequence = IVNNATNVVVK; Mods = OGlycan/1095.3966 z=3  
 Glycan = HexNAc(3)Hex(3)  
 Score = 144.15  
 XIC Area = 8.39e+6; XIC % Mod =  
 Expected m/z = 760.7036; Obs m/z = 760.7038  
 Error (ppm) = 0.26  
 Retention Time (min) = 75.40  
 InSilico status:

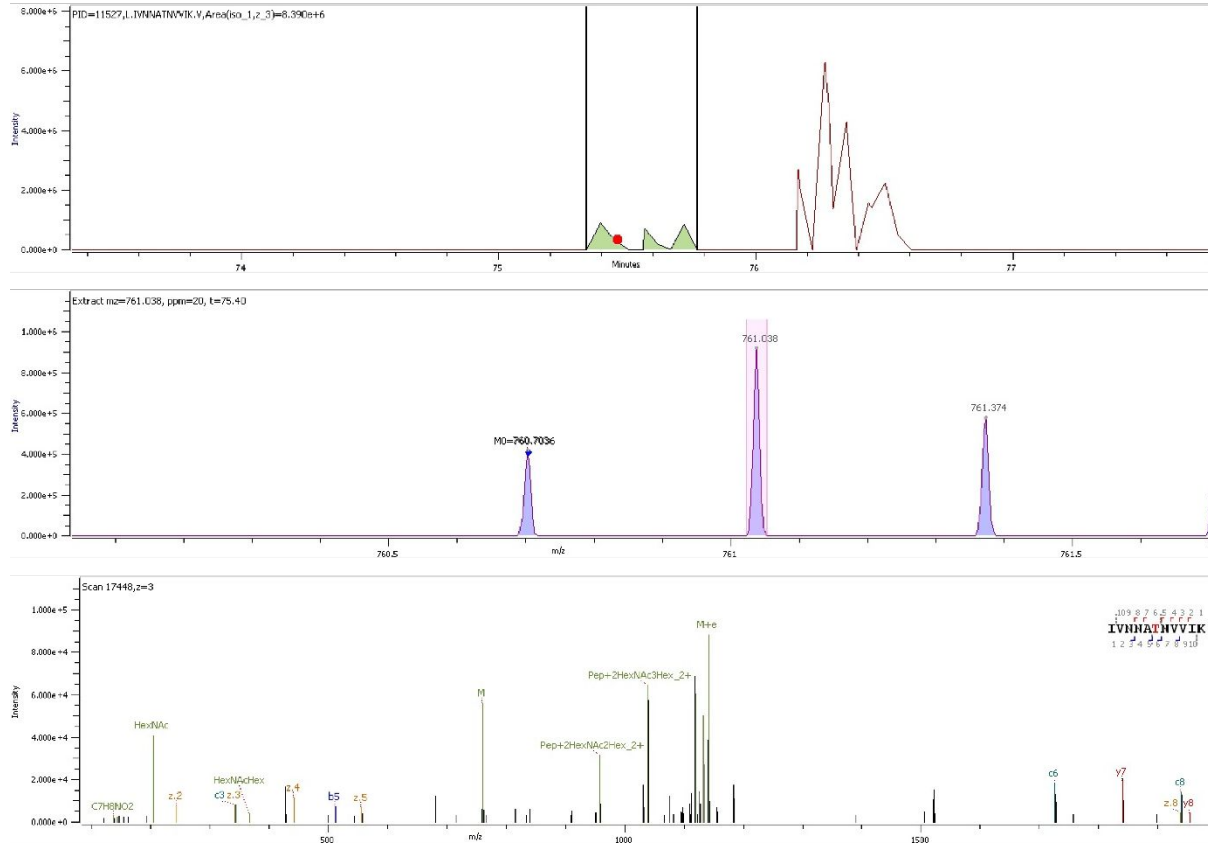

# HexaPro - T478

T.C478.488  
Sequence = TPCNGVEGFNCYFPLQSYGFQPTNGVGYQPYYR; Mods = OHexNac/203.0794; Carbamidomethyl/57.0215 z=4  
Glycan = HexNAc(1)  
Score = 159.60  
XIC Area = 3.23e+7; XIC % Mod =  
Expected m/z = 966.6831; Obs m/z = 966.6841  
Error (ppm) = 1.06  
Retention Time (min) = 213.43  
InSico status:

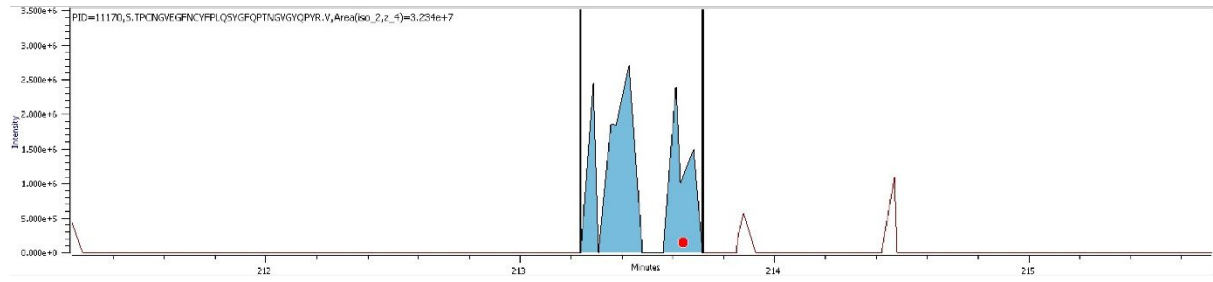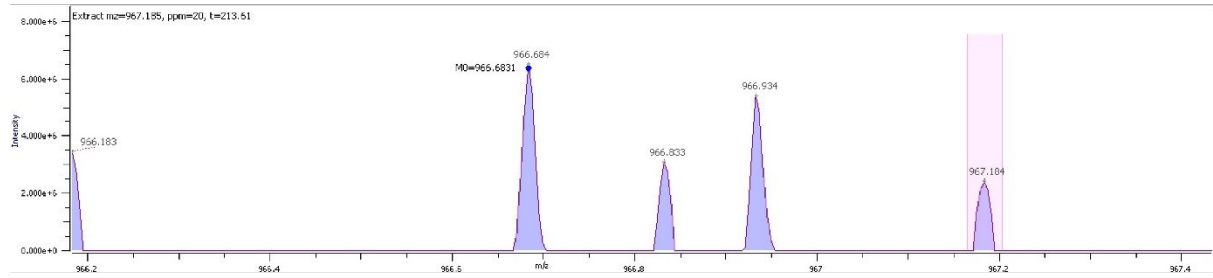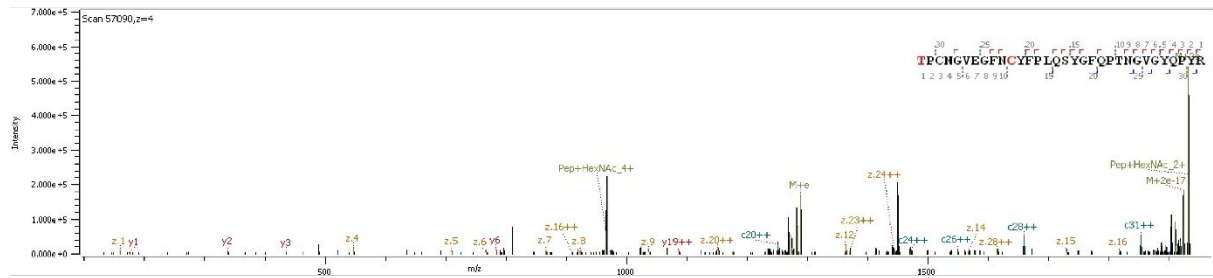

# 2P - T696/S698/S704

T696

Sequence = TMSLGAENSVAY; Mods = OGlycan203.0794 ≠2

Glycan = HexNAc(1)

Score = 127.67

XIC Area = 2.11e+7; XIC % Mod = 0.050

Expected m/z = 723.3269; Obs m/z = 723.3271

Error (ppm) = 0.33

Retention Time (min) = 124.29

InSilico status:

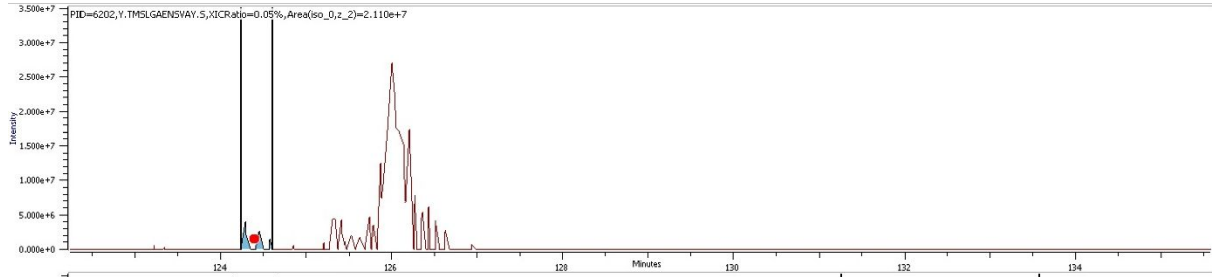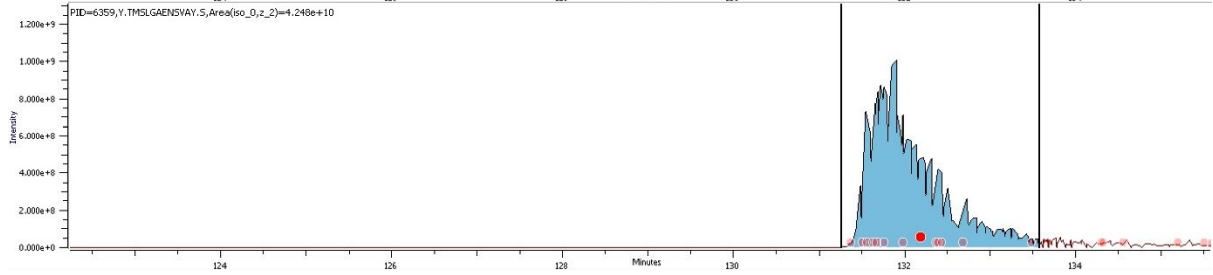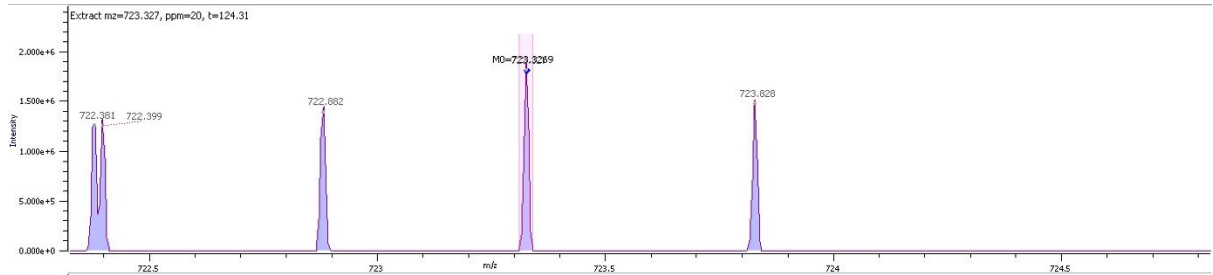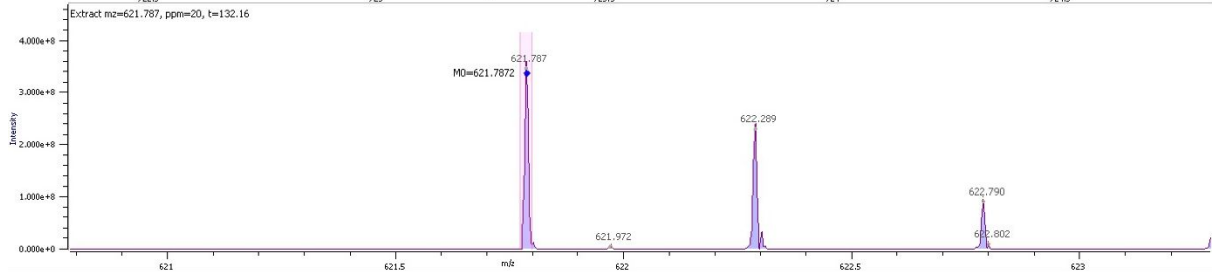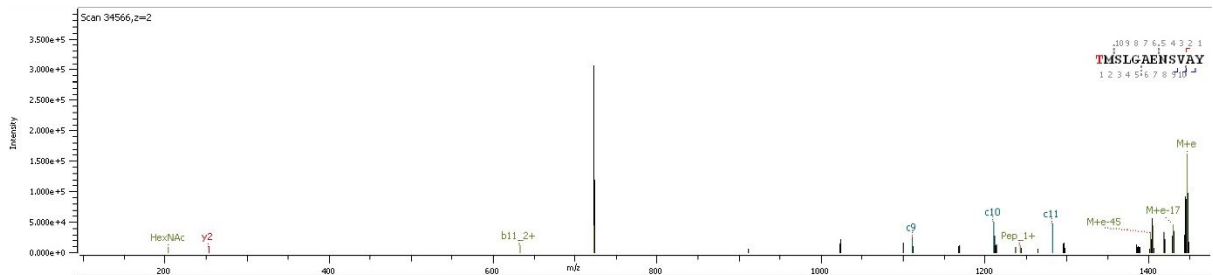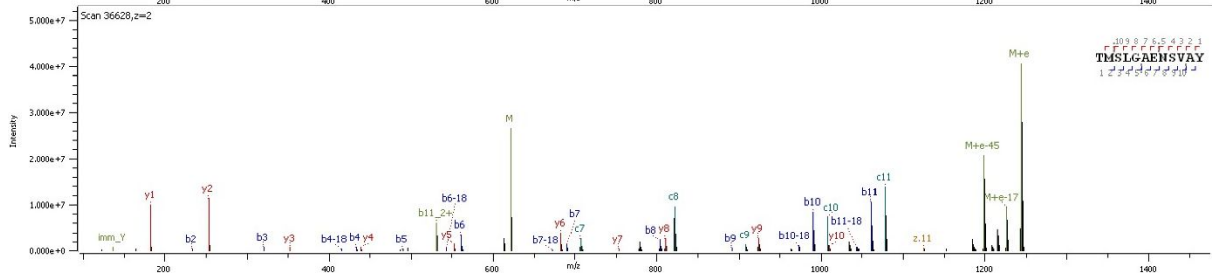

# HexaPro - S1175

S,N1175,1178  
Sequence = SVVNIQKEIDRLNEV; Mods = Oglycan/406.1587; Deamidated/0.9840 z=4  
Glycan = HexNAc(2)  
Score = 288.22  
XIC Area = 1.62e+8; XIC % Mod =  
Expected m/z = 541.5311; Obs m/z = 541.5321  
Error (ppm) = 1.84  
Retention Time (min) = 109.41  
InSilico status:

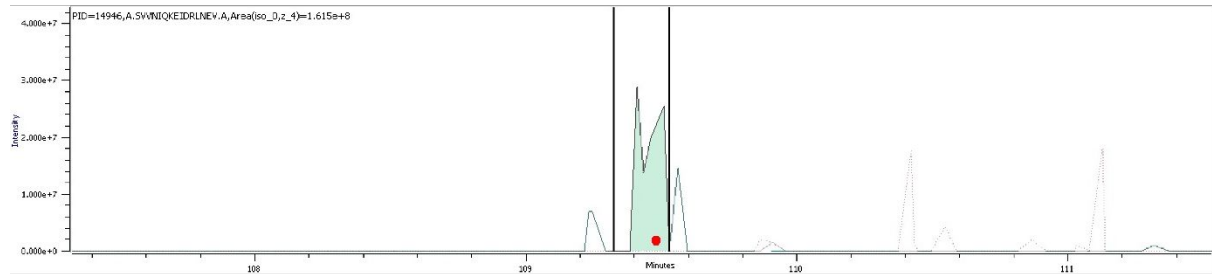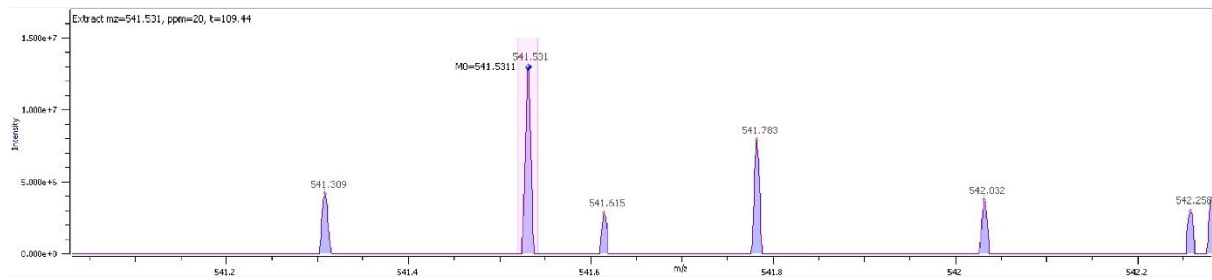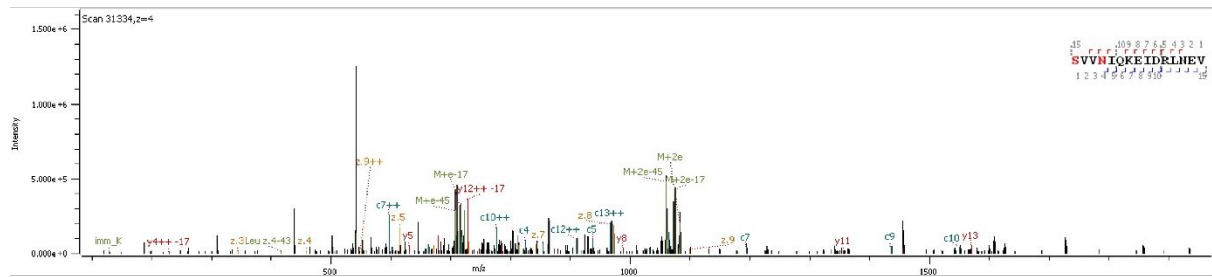



| Site | Construct | Run | Sequence       | Glycans                       | Score           | XIC      | occupancy |
|------|-----------|-----|----------------|-------------------------------|-----------------|----------|-----------|
| T323 | RBD WT    | 1   | R.RVQPtESIVR.F | HexNAc(1)                     | 186.76 - 461.02 | 6.22E+08 | 0.50%     |
| T323 | RBD WT    | 1   | R.RVQPtESIVR.F | HexNAc(1)Hex(1)               | 141.58 - 540.85 | 1.53E+09 | 1.23%     |
| T323 | RBD WT    | 1   | R.RVQPtESIVR.F | HexNAc(1)Hex(1)NeuAc(1)       | 178.17 - 520.06 | 5.07E+10 | 40.92%    |
| T323 | RBD WT    | 1   | R.RVQPtESIVR.F | HexNAc(1)Hex(1)NeuAc(2)       |                 | 8.83E+09 | 7.13%     |
| T323 | RBD WT    | 1   | R.RVQPtESIVR.F | HexNAc(2)Hex(1)Fuc(1)         | 231.50 - 256.09 | 2.63E+07 | 0.02%     |
| T323 | RBD WT    | 1   | R.RVQPtESIVR.F | HexNAc(2)Hex(1)NeuAc(1)       | 345.4           | 5.57E+08 | 0.45%     |
| T323 | RBD WT    | 1   | R.RVQPtESIVR.F | HexNAc(2)Hex(2)               | 181.05 - 491.12 | 2.46E+10 | 19.85%    |
| T323 | RBD WT    | 1   | R.RVQPtESIVR.F | HexNAc(2)Hex(2)Fuc(1)         | 102.95 - 457.45 | 7.36E+09 | 5.94%     |
| T323 | RBD WT    | 1   | R.RVQPtESIVR.F | HexNAc(2)Hex(2)Fuc(1)NeuAc(1) | 309.57 - 309.71 | 6.34E+08 | 0.51%     |
| T323 | RBD WT    | 1   | R.RVQPtESIVR.F | HexNAc(2)Hex(2)Fuc(2)         | 312.32 - 452.71 | 1.83E+09 | 1.48%     |
| T323 | RBD WT    | 1   | R.RVQPtESIVR.F | HexNAc(2)Hex(2)Fuc(2)NeuAc(1) | 231.33          | 2.62E+08 | 0.21%     |
| T323 | RBD WT    | 1   | R.RVQPtESIVR.F | HexNAc(2)Hex(2)NeuAc(1)       | 346.53          | 7.69E+08 | 0.62%     |
| T323 | RBD WT    | 1   | R.RVQPtESIVR.F | HexNAc(3)                     | 172.45 - 260.85 | 2.02E+07 | 0.02%     |
| T323 | RBD WT    | 1   | R.RVQPtESIVR.F | HexNAc(3)Hex(1)               | 46.89 - 530.14  | 9.85E+09 | 7.95%     |
| T323 | RBD WT    | 1   | R.RVQPtESIVR.F | HexNAc(3)Hex(1)Fuc(1)         | 96.80 - 417.07  | 8.37E+09 | 6.75%     |
| T323 | RBD WT    | 1   | R.RVQPtESIVR.F | HexNAc(3)Hex(1)Fuc(2)         | 273.95 - 277.01 | 6.58E+07 | 0.05%     |
| T323 | RBD WT    | 1   | R.RVQPtESIVR.F | HexNAc(3)Hex(2)Fuc(1)         | 239.49          | 1.22E+07 | 0.01%     |
| T323 | RBD WT    | 1   | R.RVQPtESIVR.F | HexNAc(4)Hex(1)Fuc(1)         | 150.93          | 3.37E+06 | 0.00%     |
| T323 | RBD WT    | 1   | R.RVQPtESIVR.F | Unoccupied                    | 97.95 - 572.78  | 7.87E+09 | 6.35%     |
| T323 | RBD WT    | 2   | R.RVQPtESIVR.F | HexNAc(1)Hex(1)               | 42.13 - 249.41  | 2.26E+07 | 0.06%     |
| T323 | RBD WT    | 2   | R.RVQPtESIVR.F | HexNAc(1)Hex(1)NeuAc(1)       | 91.96 - 443.49  | 2.81E+10 | 76.53%    |
| T323 | RBD WT    | 2   | R.RVQPtESIVR.F | HexNAc(1)Hex(1)NeuAc(2)       | 40.96 - 538.64  | 5.46E+09 | 14.87%    |
| T323 | RBD WT    | 2   | R.RVQPtESIVR.F | HexNAc(2)Hex(2)Fuc(1)NeuAc(1) | 328.00 - 332.19 | 3.58E+08 | 0.97%     |
| T323 | RBD WT    | 2   | R.RVQPtESIVR.F | HexNAc(2)Hex(2)Fuc(2)NeuAc(1) | 229.99          | 1.10E+08 | 0.30%     |
| T323 | RBD WT    | 2   | R.RVQPtESIVR.F | HexNAc(2)Hex(2)NeuAc(1)       | 190.64 - 470.79 | 1.56E+09 | 4.25%     |
| T323 | RBD WT    | 2   | R.RVQPtESIVR.F | HexNAc(3)Hex(1)               | 175.66          | 2.44E+07 | 0.07%     |
| T323 | RBD WT    | 2   | R.RVQPtESIVR.F | HexNAc(3)Hex(1)Fuc(1)NeuAc(1) | 109.9           | 3.04E+06 | 0.01%     |
| T323 | RBD WT    | 2   | R.RVQPtESIVR.F | HexNAc(3)Hex(1)NeuAc(1)       | 105.02          | 1.58E+06 | 0.00%     |
| T323 | RBD WT    | 2   | R.RVQPtESIVR.F | unoccupied                    | 26.52           | 1.08E+09 | 2.94%     |
| T323 | RBD WT    | 3   | R.RVQPtESIVR.F | HexNAc(1)Hex(1)               | 183.7           | 2.70E+08 | 1.58%     |
| T323 | RBD WT    | 3   | R.RVQPtESIVR.F | HexNAc(1)Hex(1)NeuAc(1)       | 204.95 - 292.23 | 1.55E+10 | 90.80%    |
| T323 | RBD WT    | 3   | R.RVQPtESIVR.F | HexNAc(1)Hex(1)NeuAc(2)       | 84.91 - 248.78  | 1.18E+09 | 6.91%     |
| T323 | RBD WT    | 3   | R.RVQPtESIVR.F | HexNAc(2)Hex(1)NeuAc(1)       | 80.66 - 238.06  | 5.68E+07 | 0.33%     |
| T323 | RBD WT    | 3   | R.RVQPtESIVR.F | HexNAc(3)Hex(1)NeuAc(1)       | 155.48          | 4.25E+07 | 0.25%     |
| T323 | RBD WT    | 3   | R.RVQPtESIVR.F | unoccupied                    | 132.39          | 2.07E+07 | 0.12%     |
| T323 | RBD Kif   | 1   | R.RVQPtESIVR.F | HexNAc(1)Hex(1)NeuAc(1)       | 274.14 - 288.49 | 5.67E+07 | 0.25%     |
| T323 | RBD Kif   | 1   | R.RVQPtESIVR.F | HexNAc(1)Hex(1)NeuAc(2)       | 85.60 - 347.95  | 2.28E+10 | 99.35%    |
| T323 | RBD Kif   | 1   | R.RVQPtESIVR.F | HexNAc(2)Hex(2)NeuAc(2)       | 18.43 - 301.96  | 8.63E+07 | 0.38%     |
| T323 | RBD Kif   | 1   | R.RVQPtESIVR.F | unoccupied                    | 142.87          | 6.90E+06 | 0.03%     |
| T323 | RBD Kif   | 2   | R.RVQPtESIVR.F | HexNAc(1)Hex(1)NeuAc(2)       | 3.04 - 306.48   | 2.26E+10 | 99.27%    |
| T323 | RBD Kif   | 2   | R.RVQPtESIVR.F | HexNAc(2)Hex(2)NeuAc(2)       | 26.87 - 336.19  | 8.59E+07 | 0.38%     |
| T323 | RBD Kif   | 2   | R.RVQPtESIVR.F | unoccupied                    | 25.04 - 223.91  | 7.98E+07 | 0.35%     |
| T323 | RBD Kif   | 3   | R.RVQPtESIVR.F | HexNAc(1)Hex(1)NeuAc(1)       | 24.47 - 133.08  | 2.14E+07 | 0.28%     |
| T323 | RBD Kif   | 3   | R.RVQPtESIVR.F | HexNAc(1)Hex(1)NeuAc(2)       | 31.18 - 333.96  | 7.68E+09 | 99.69%    |
| T323 | RBD Kif   | 3   | R.RVQPtESIVR.F | unoccupied                    | 179.14          | 2.49E+06 | 0.03%     |

Table S3: Unambiguously assigned O-links on peptide <sup>319</sup>RVQPTEIVR<sup>328</sup> from WT and KT RBD

Figure S8 MS2 spectra of the most abundant glycans from  $^{319}\text{RVQPTESIVR}^{328}$  from WT and KT RBD

## RBD KT - T323

T40  
Sequence = RVQPTESIVR; Mods = OGlycan947.3230 z=3  
Glycan = HexNAc(1)Hex(1)NeuAc(2)  
Score = 85.60 - 347.95  
XIC Area = 2.27e+10; XIC % Mod = 99.970  
Expected m/z = 711.3374; Obs m/z = 711.3365 - 711.3379  
Error (ppm) = 0.23; -0.03; 0.57; 0.40; -0.38; -1.32; 0.48; 0.74  
Retention Time (min) = 82.35  
InSilico status:

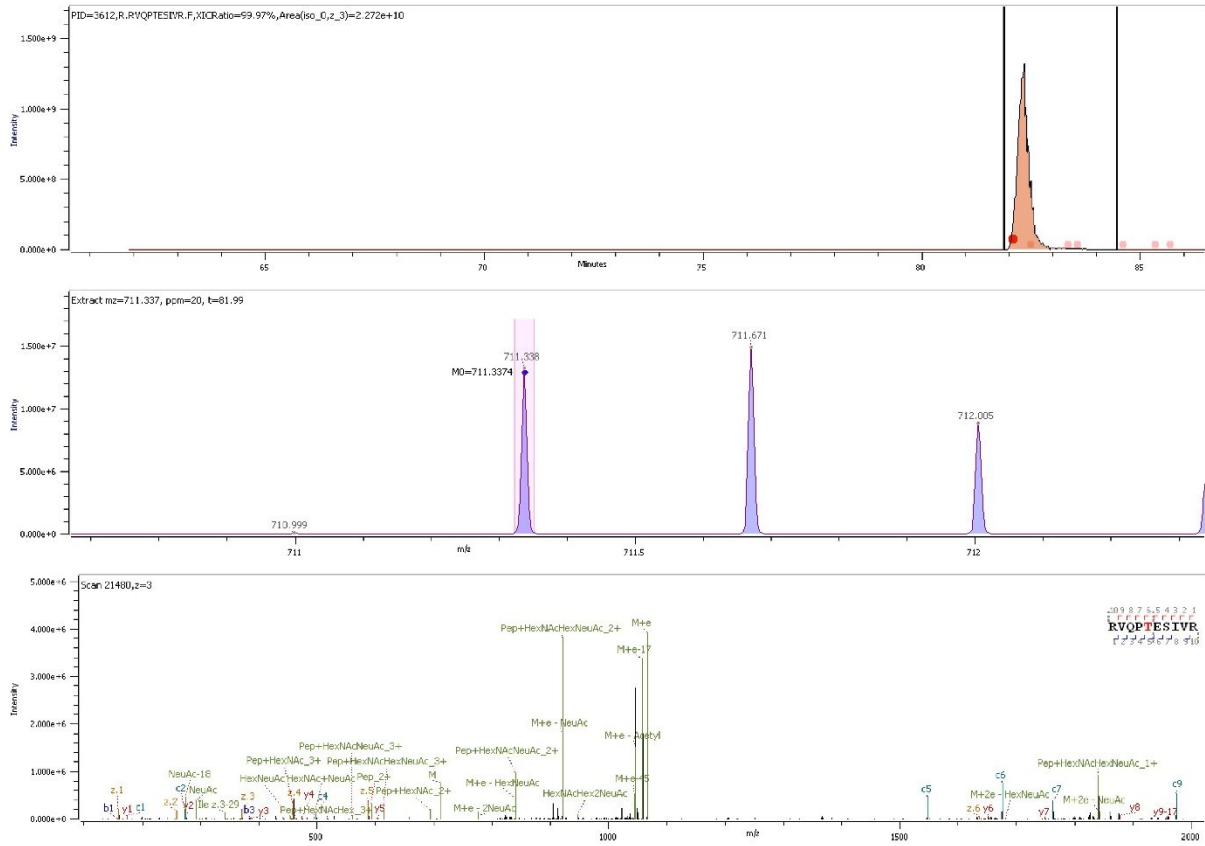

# RBD KT - T323

T40

Sequence = RVQPTEIVR, Mods = OGlycan/1312.4552 z=4

Glycan = HexNAc(2)Hex(2)NeuAc(2)

Score = 26.87

XIC Area = 5.29e+6; XIC % Mod =

Expected m/z = 625.0379; Obs m/z = 625.0381

Error (ppm) = 0.31

Retention Time (min) = 80.35

InSilico status:

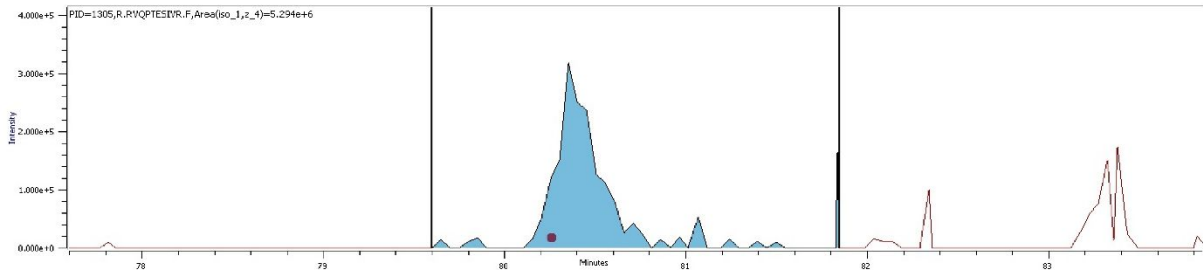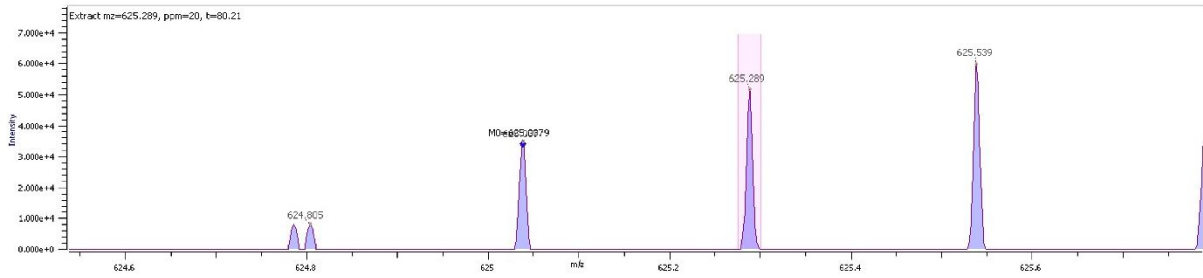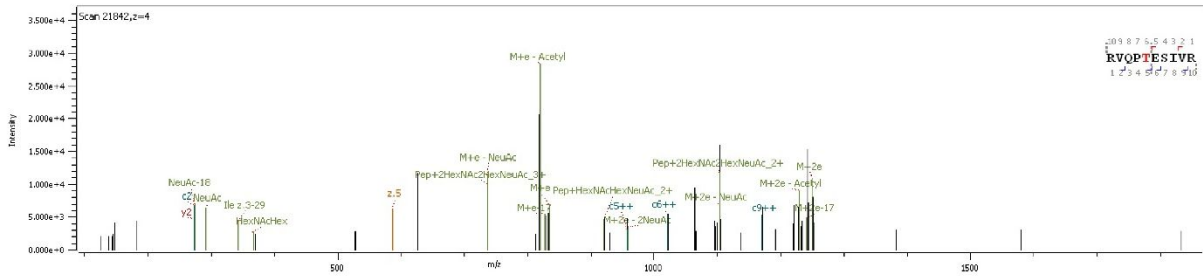

# RBD KT - T323

T40

Sequence = RVQPTEIVR, Mods = OGlycan947.3230 z=3

Glycan = HexNAc(1)Hex(1)NeuAc(2)

Score = 31.18 - 333.96

XIC Area = 7.65e+9; XIC % Mod = 99.968

Expected m/z = 711.3374; Obs m/z = 711.3374 - 711.3382

Error (ppm) = 0.23; 0.65; 0.48; 0.14; 0.57; 1.08; -0.03

Retention Time (min) = 83.79

InSilico status:

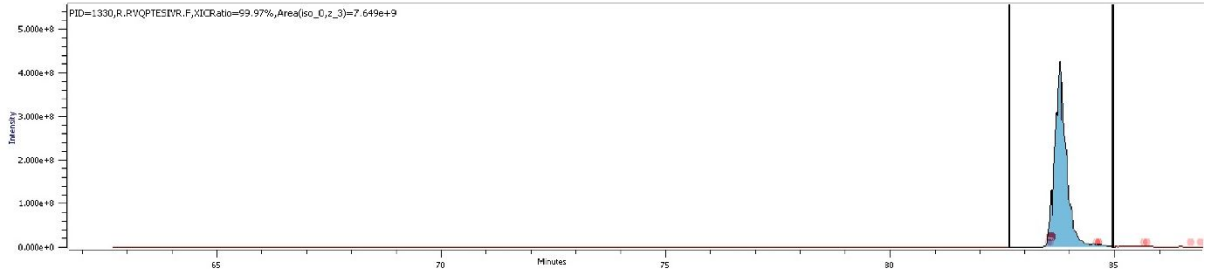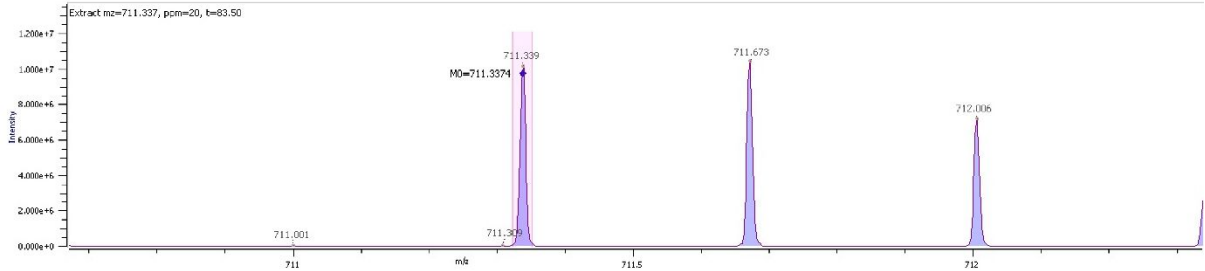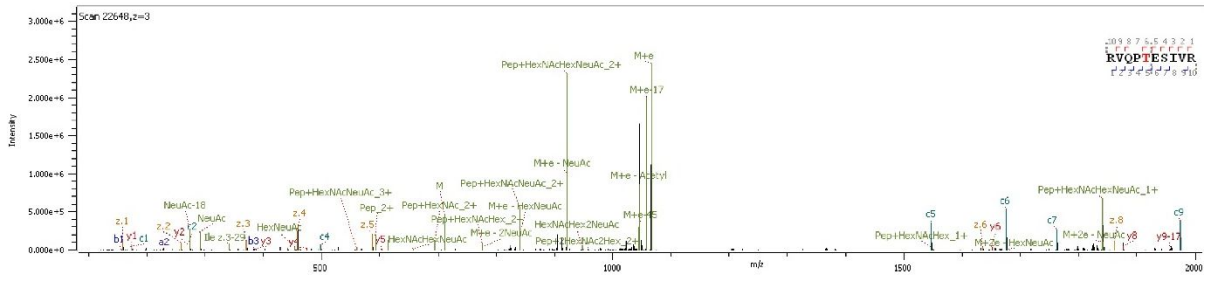

# RBD WT - T323

T40

Sequence = RVQPTEIVR; Mods = OGlycan/656.2276 z=3

Glycan = HexNAc(1)Hex(1)NeuAc(1)

Score = 178.17 - 520.06

XIC Area = 5.07e+10; XIC % Mod = 95.449

Expected m/z = 614.3056; Obs m/z = 614.3053 - 614.3079

Error (ppm) = 3.81; 1.82; 0.62; 0.12; 0.52; 0.03; 0.22; -0.47

Retention Time (min) = 66.65

InSilico status:

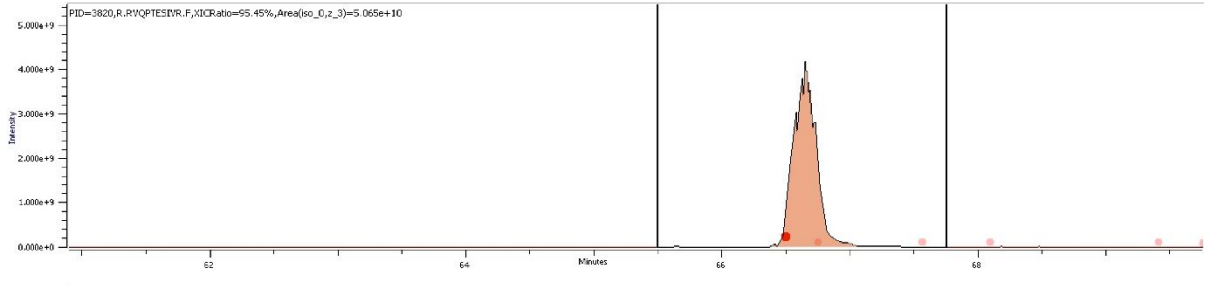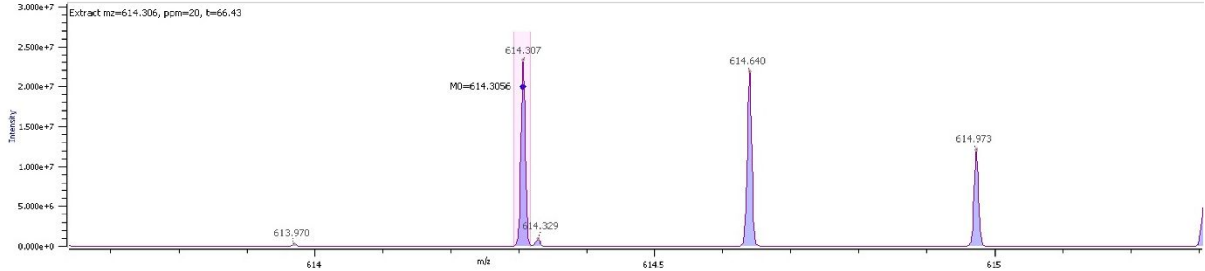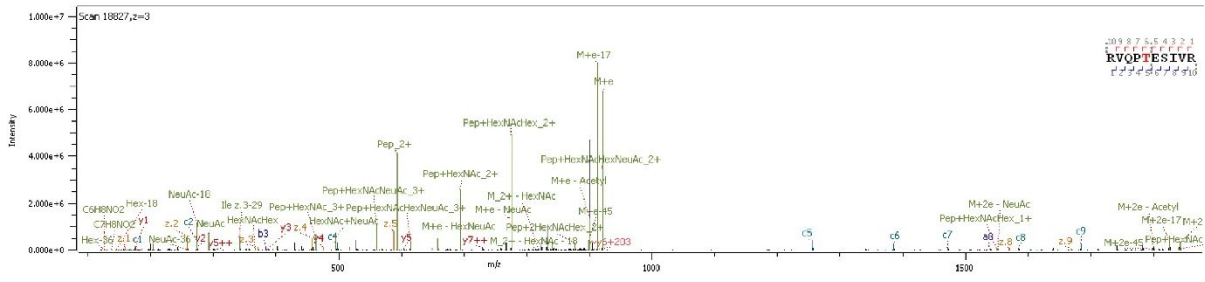

# RBD WT - T323

T40

Sequence = RVQPTEIVR; Mods = OGlycan/656.2276 z=3

Glycan = HexNAc(1)Hex(1)NeuAc(1)

Score = 91.96 - 443.49

XIC Area = 2.81e+10; XIC % Mod = 99.984

Expected m/z = 614.3056; Obs m/z = 614.3050 - 614.3069

Error (ppm) = -0.57; 2.21; 0.42; 0.72; -0.37; -0.27; -0.07; -0.97

Retention Time (min) = 69.06

InSilico status:

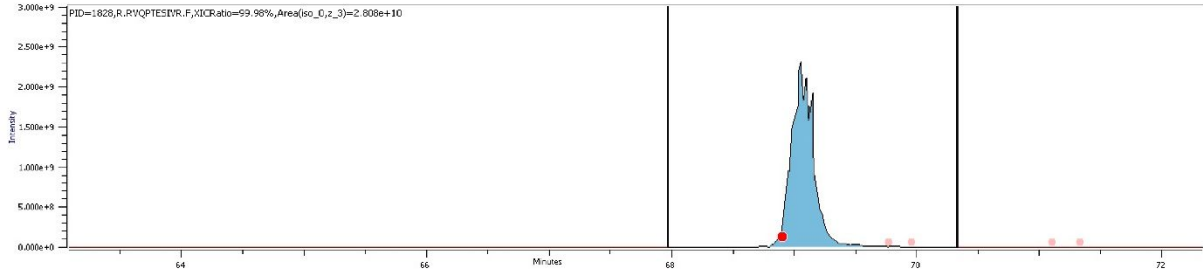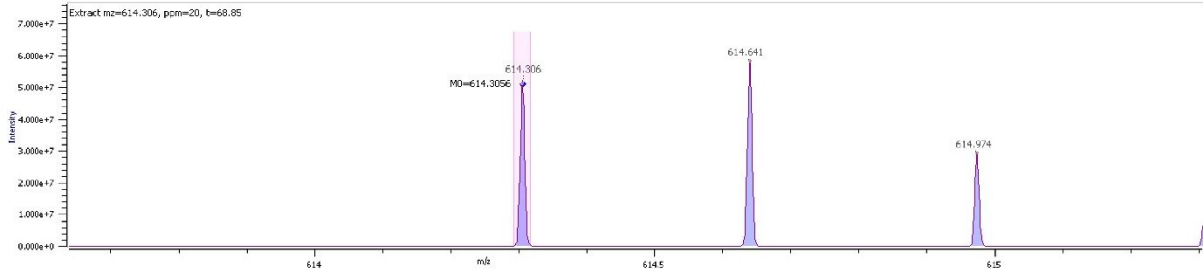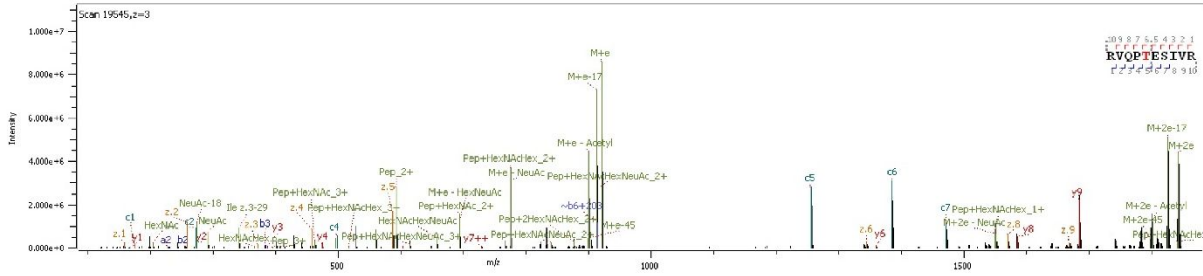

# RBD WT - T323

T40  
Sequence = RVQPTEIVR; Mods = OGlycan947.3230 z=3  
Glycan = HexNAc(1)Hex(1)NeuAc(2)  
Score = 13.94 - 274.44  
XIC Area = 1.21e+10; XIC % Mod = 99.971  
Expected m/z = 711.3374; Obs m/z = 711.3376 - 711.3379  
Error (ppm) = 0.74; 0.31; 0.48; 0.23; 0.40  
Retention Time (min) = 83.07  
InSilico status:

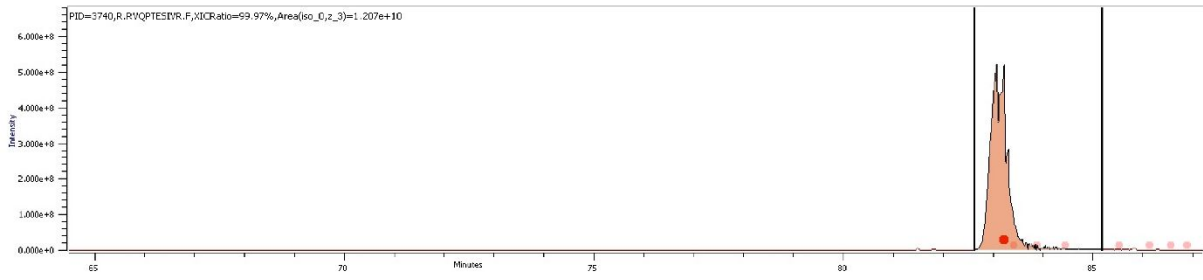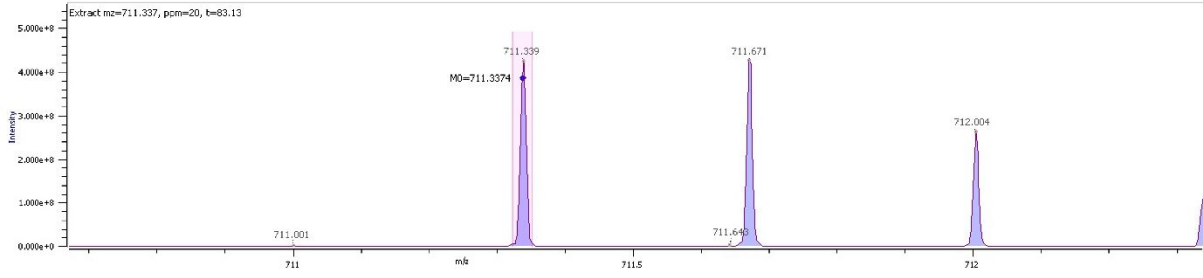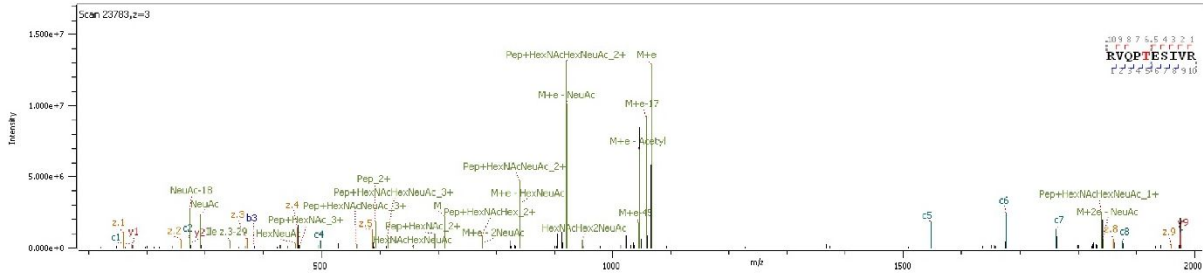

| Site      | Construct | Run | Sequence                 | Glycans                       | Score           | XIC      | occupancy |
|-----------|-----------|-----|--------------------------|-------------------------------|-----------------|----------|-----------|
| S469/T470 | RBD WT    | 1   | F.ERDIStEiY.Q            | HexNAc(1)Hex(1)               | 231.4           | 7.31E+07 | 0.0100%   |
| S469/T470 | RBD WT    | 2   | F.ERDIStEiY.Q            | HexNAc(1)                     | 148.82          | 1.64E+07 | 0.0012%   |
| S469/T470 | RBD WT    | 3   | F.ERDIStEiY.Q            | HexNAc(1)Hex(1)               | 179.88          | 6.10E+07 | 0.0100%   |
| T523      | RBD WT    | 2   | R.VVVLStFELLHAPAtVcGPK.K | HexNAc(1)Hex(1)NeuAc(2)       | 248.28          | 2.28E+07 | 0.0040%   |
| T523      | RBD WT    | 2   | R.VVVLStFELLHAPAtVcGPK.K | HexNAc(1)Hex(1)NeuAc(1)       | 305.09 - 452.70 | 1.36E+08 | 0.0238%   |
| T523      | RBD WT    | 3   | R.VVVLStFELLHAPAtVcGPK.K | HexNAc(1)                     | 242.09          | 3.27E+07 | 0.0028%   |
| T523      | RBD WT    | 3   | R.VVVLStFELLHAPAtVcGPK.K | HexNAc(1)Hex(1)NeuAc(1)       | 298.7           | 2.02E+08 | 0.0171%   |
| T470      | RBD KT    | 2   | F.ERDIStEiY.Q            | HexNAc(1)                     | 172.27          | 1.58E+07 | 0.0021%   |
| T470      | RBD KT    | 2   | F.ERDIStEiY.Q            | HexNAc(1)Hex(1)               | 182.28          | 1.80E+07 | 0.0024%   |
| T470      | RBD KT    | 3   | F.ERDIStEiY.Q            | HexNAc(1)Hex(1)               | 157.85 - 193.39 | 1.68E+07 | 0.0020%   |
| T470      | RBD KT    | 3   | F.ERDIStEiY.Q            | HexNAc(1)                     | 175.95 - 191.04 | 2.23E+07 | 0.0027%   |
| T523      | RBD KT    | 1   | R.VVVLStFELLHAPAtVcGPK.K | HexNAc(1)Hex(1)NeuAc(2)       | 296.11          | 4.65E+06 | 0.0039%   |
| T523      | RBD KT    | 2   | R.VVVLStFELLHAPAtVcGPK.K | HexNAc(2)Hex(2)Fuc(1)NeuAc(1) | 138.84          | 1.38E+06 | 0.0010%   |
| T523      | RBD KT    | 2   | R.VVVLStFELLHAPAtVcGPK.K | HexNAc(1)                     | 200.26 - 222.34 | 6.29E+07 | 0.0459%   |
| T523      | RBD KT    | 2   | R.VVVLStFELLHAPAtVcGPK.K | HexNAc(1)Hex(1)NeuAc(2)       | 1.47 - 634.75   | 6.87E+07 | 0.0501%   |

Table S4: Unambiguously assigned O-links on peptides <sup>465</sup>ERDIStEiY<sup>473</sup> and <sup>510</sup>VVVLStFELLHAPAtVcGPK<sup>528</sup> from WT and KT RBD



**Figure S9** MS2 spectra of the most abundant glycans on peptides <sup>465</sup>ERDISTEY<sup>473</sup> and <sup>510</sup>VVVLSELLHAPATVCGPK<sup>528</sup> from WT and KT RBD

## RBD KT - T470

T187  
 Sequence = ERDISTEY; Mods = OGlycan/203.0794 z=2  
 Glycan = HexNAc(1)  
 Score = 172.27  
 XIC Area = 1.58e+7; XIC % Mod = 0.002  
 Expected m/z = 664.8144; Obs m/z = 664.8148  
 Error (ppm) = 0.56  
 Retention Time (min) = 96.99  
 InSilico status:

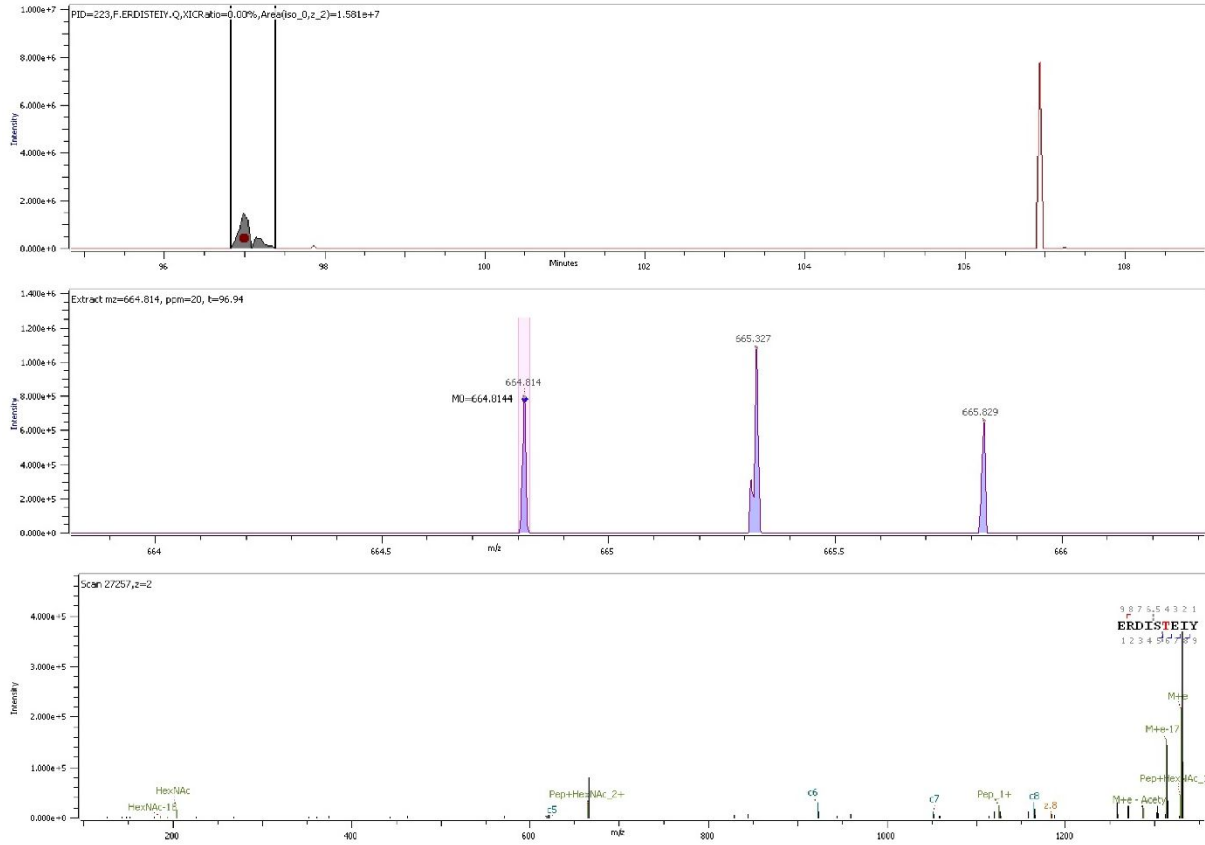

# RBD KT - T470

T187

Sequence = ERDISTEIV; Mods = OGlycan/203.0794 z=2

Glycan = HexNAc(1)

Score = 175.95 - 191.04

XIC Area = 2.23e+7; XIC % Mod = 0.003

Expected m/z = 664.8144; Obs m/z = 664.8145 - 664.8152

Error (ppm) = 0.10; 1.13

Retention Time (min) = 95.94

InSilico status:

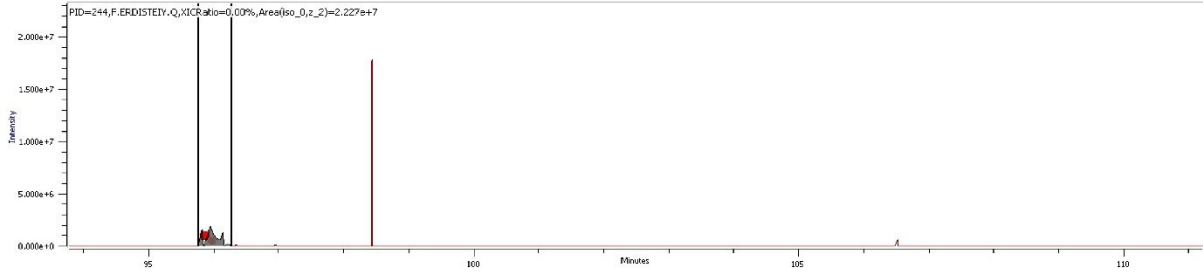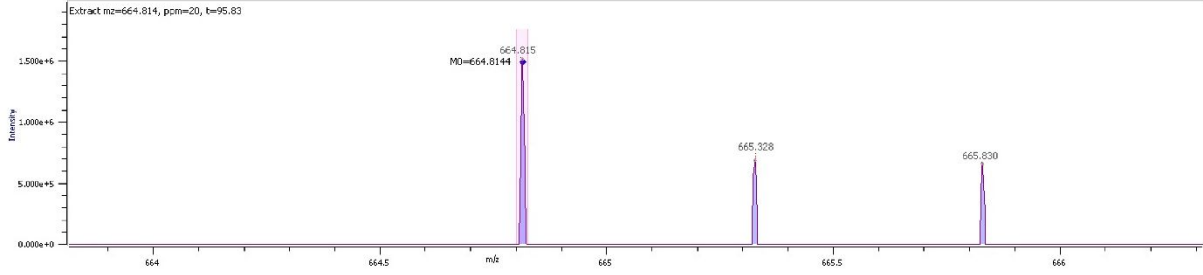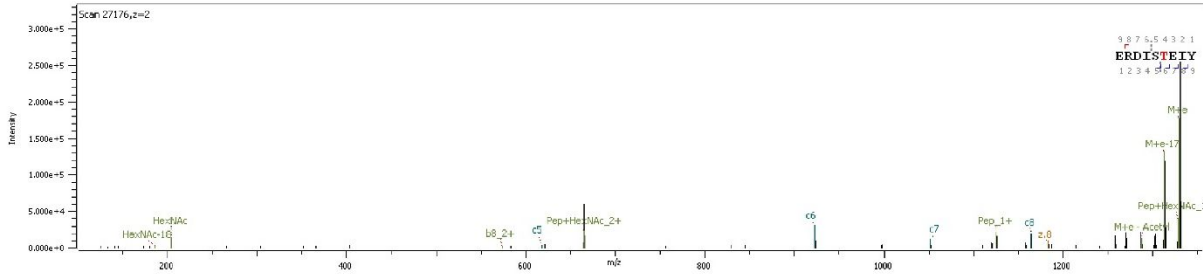

# RBD KT - T523

T:C240,242  
Sequence - VVVLSEFLLHAPATVCGPK; Mods - OGlycan/947.3230; Carbamidomethyl/57.0215 z=4  
Glycan = HexNAc(1)Hex(1)NeuAc(2)  
Score = 296.11  
XIC Area = 4.65e+6; XIC % Mod =  
Expected m/z = 746.8663; Obs m/z = 746.8661  
Error (ppm) = -0.19  
Retention Time (min) = 216.30  
InSilico status:

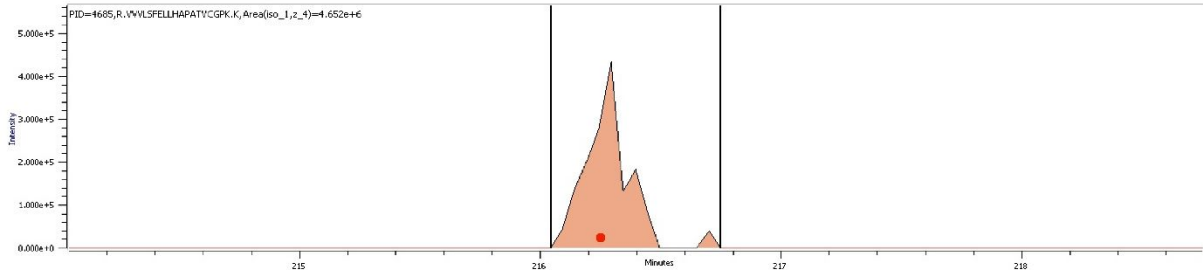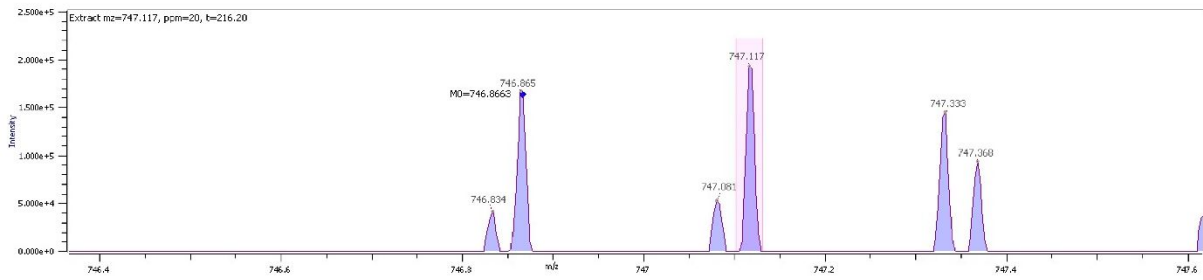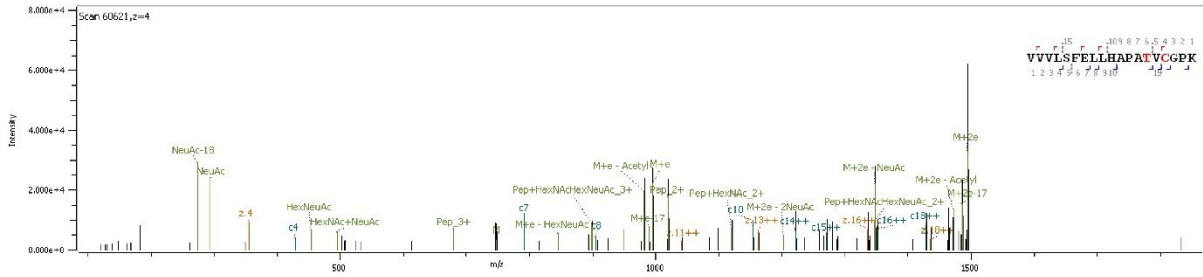

# RBD KT - T523

T.C240,242  
Sequence = VVLSFELLHAPATVCGPK; Mods = Oglycan/203.0794; Carbamidomethyl/57.0215 z=3  
Glycan = HexNAc(1)  
Score = 200.26 - 222.34  
XIC Area = 6.29e+7; XIC % Mod = 72.591  
Expected m/z = 747.4047; Obs m/z = 747.4049 - 747.4050  
Error (ppm) = 0.41; 0.25  
Retention Time (min) = 170.70  
InSilico status:

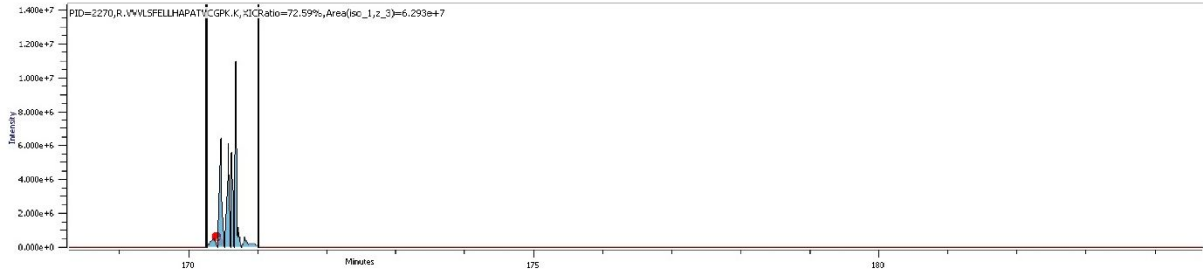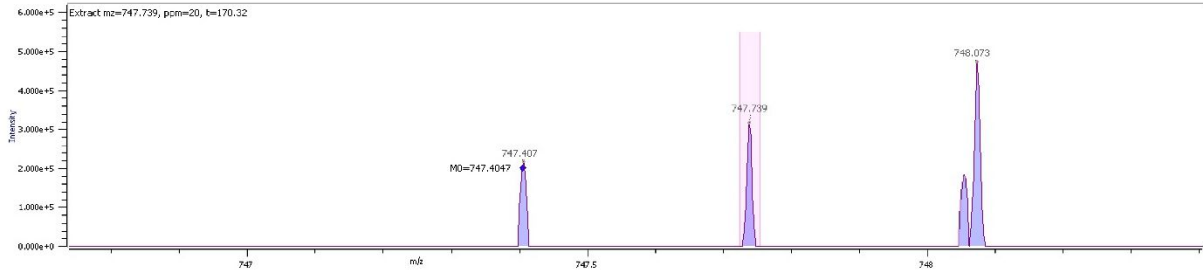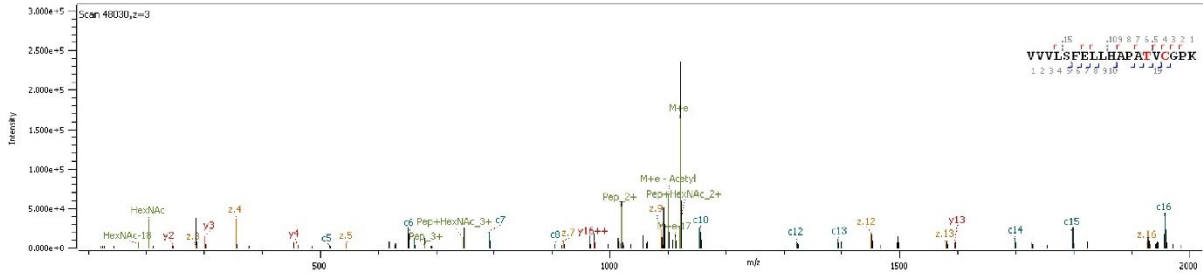

# RBD WT - S469/T470

S186  
Sequence - ERDISTEYI; Mods - OGlycan/365.1322 z=2  
Glycan = HexNAc(1)Hex(1)  
Score - 231.40  
XIC Area = 7.31e+7; XIC % Mod = 0.006  
Expected m/z = 745.8409; Obs m/z = 745.8414  
Error (ppm) = 0.69  
Retention Time (min) = 92.07  
InSilico status:

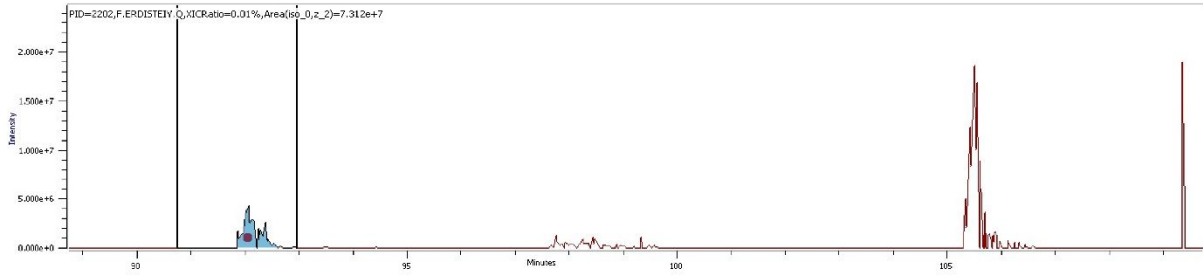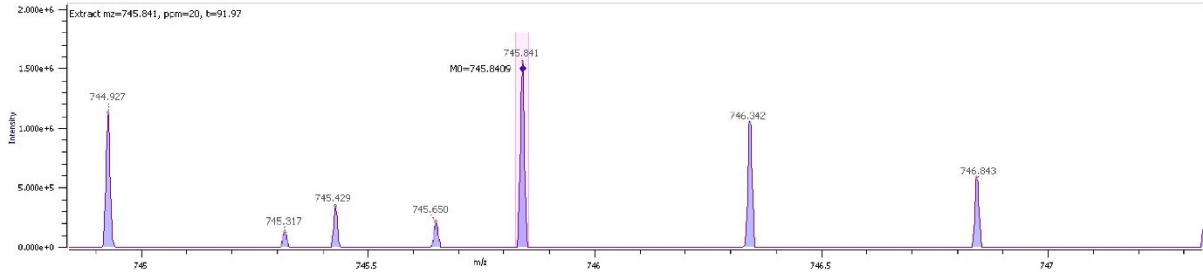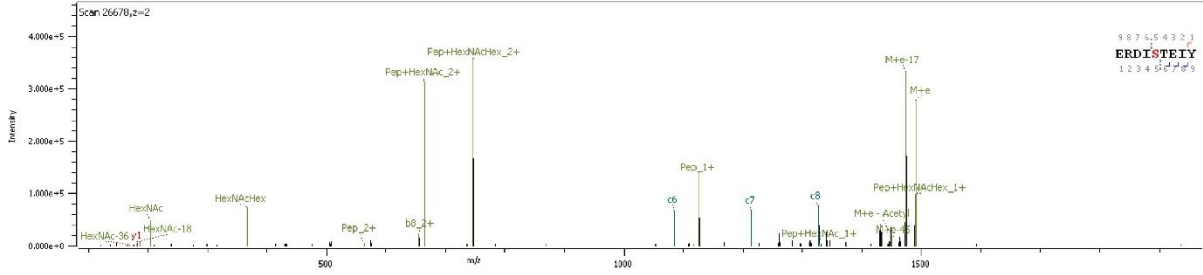

# RBD WT - S469/T470

S186

Sequence - ERDISTEIV; Mods - Oglycan/203.0794 z=2

Glycan - HexNAc(1)

Score - 148.82

XIC Area = 1.64e+7; XIC % Mod = 0.001

Expected m/z = 664.8144; Obs m/z = 664.8148

Error (ppm) = 0.56

Retention Time (min) = 95.73

InSilico status:

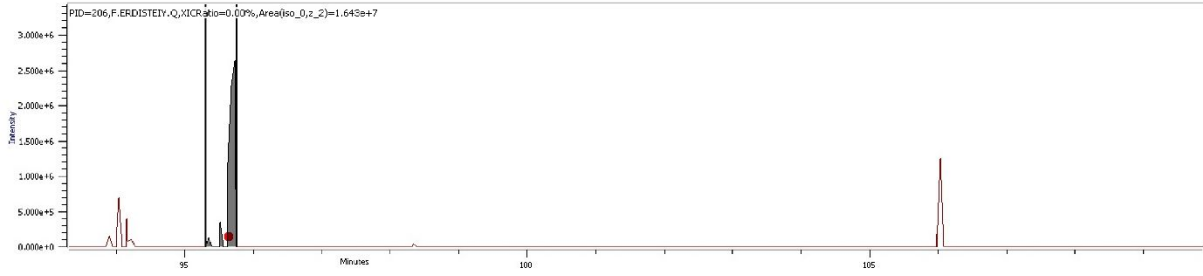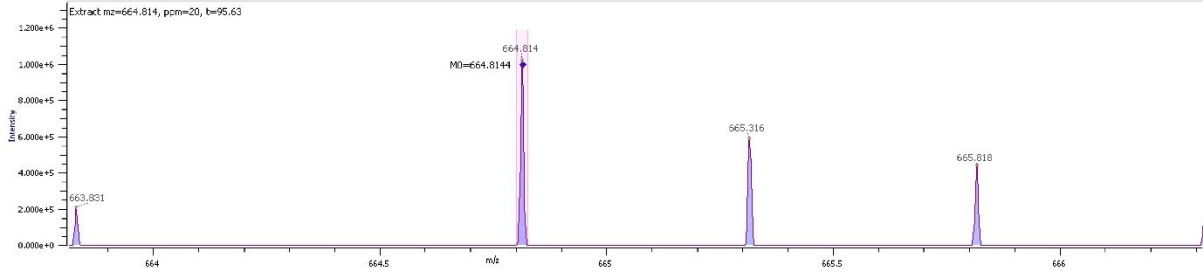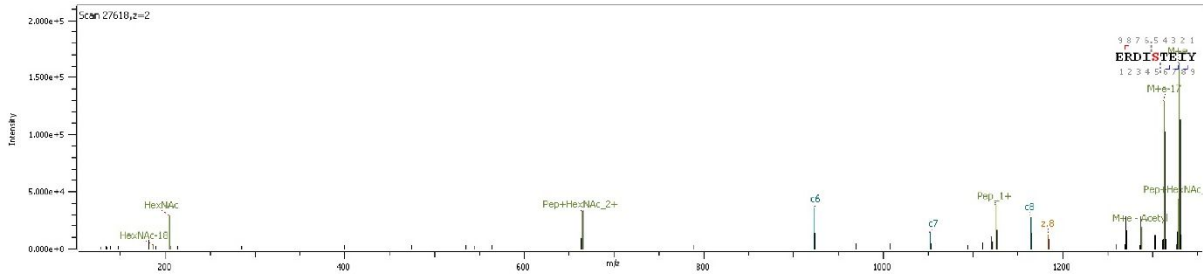

# RBD WT - S469/T470

S186

Sequence = ERDISTEY; Mods = OGlycan/365.1322 z=2

Glycan = HexNAc(1)Hex(1)

Score = 179.88

XIC Area = 6.1e+7; XIC % Mod = 0.007

Expected m/z = 745.8409; Obs m/z = 745.8410

Error (ppm) = 0.19

Retention Time (min) = 95.66

InSilico status:

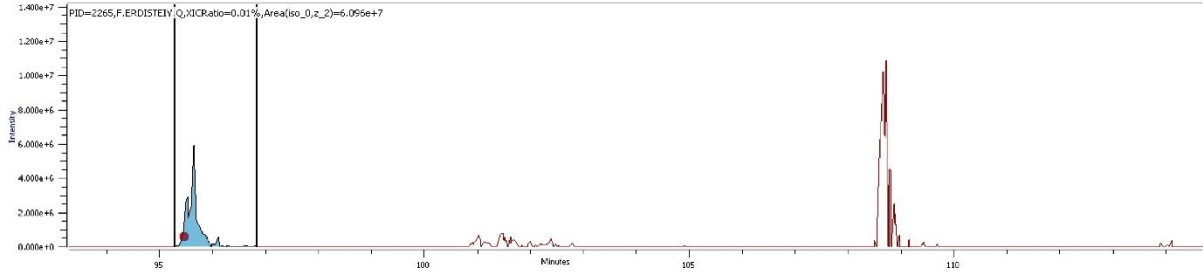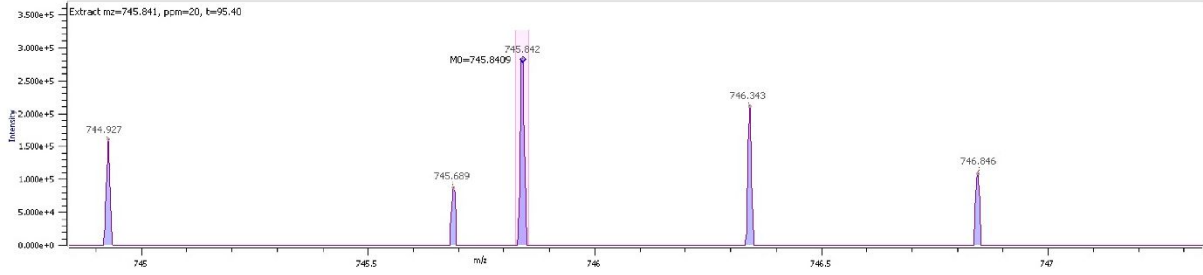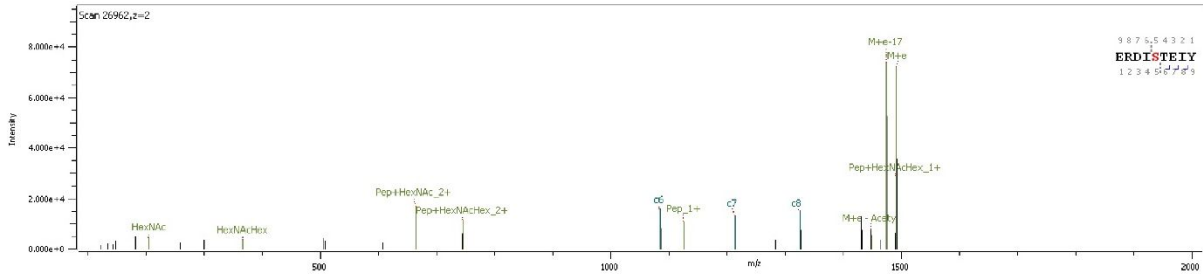

# RBD WT - T523

T.C240.242  
 Sequence = VVLSFELLHAPATVCGPK; Mods = Oglycan/656.2276; Carbamidomethyl/57.0215 z=3  
 Glycan = HexNAc(1)Hex(1)NeuAc(1)  
 Score = 305.09  
 XIC Area = 1.32e+8; XIC % Mod = 40.791  
 Expected m/z = 898.4541; Obs m/z = 898.4549  
 Error (ppm) = 0.85  
 Retention Time (min) = 189.84  
 InSilico status:

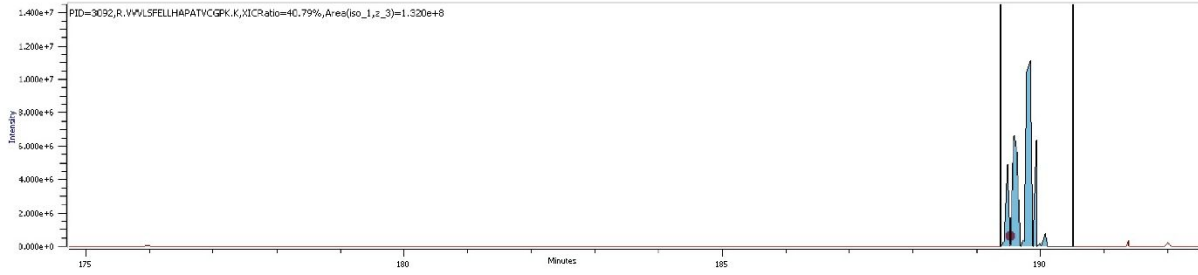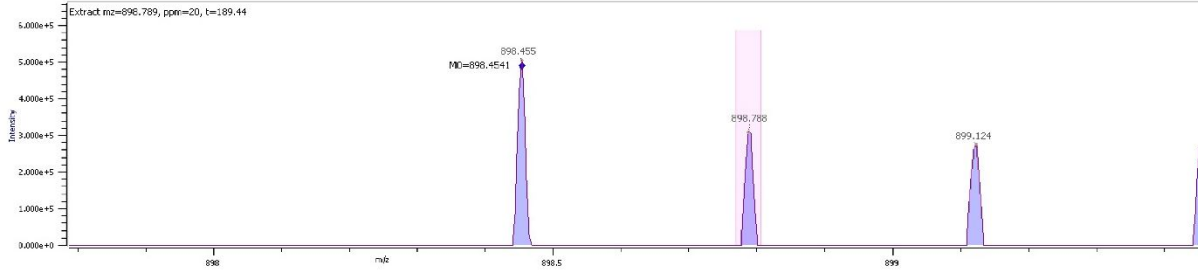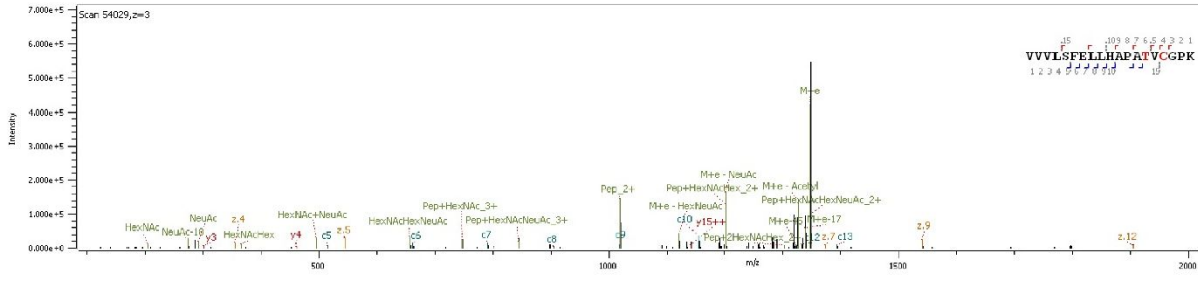



# RBD WT - T523

T.C240.242  
 Sequence = VVLSFELLHAPATVCGPK; Mods = Oglycan/656.2276; Carbanidomethyl/57.0215 z=3  
 Glycan = HexNAc(1)Hex(1)NeuAc(1)  
 Score = 298.70  
 XIC Area = 2.02e+8; XIC % Mod = 28.141  
 Expected m/z = 898.4541; Obs m/z = 898.4547  
 Error (ppm) = 0.71  
 Retention Time (min) = 190.58  
 InSilico status:

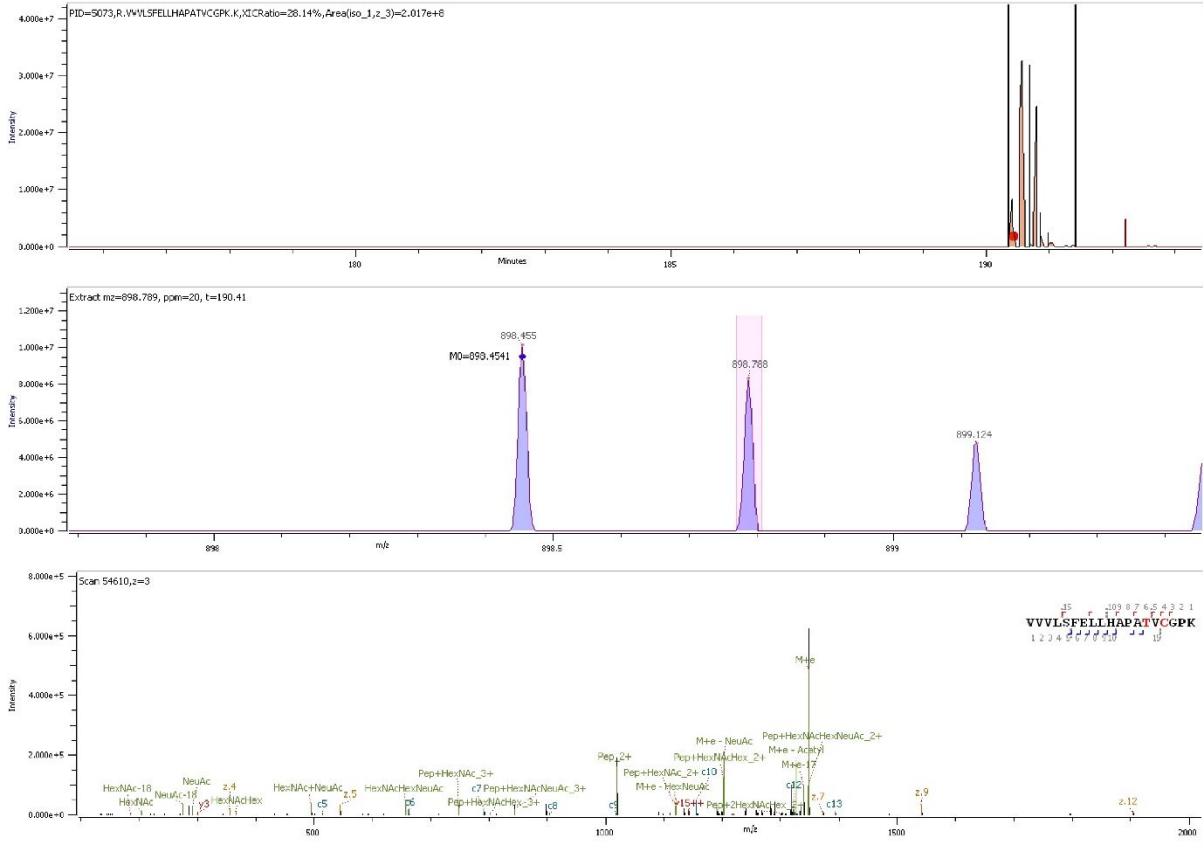

Supplement: ac1c01772_si_001.pdf [file ac1c01772_si_001.pdf]
